# Supplementary material for: The impact of female sex on anaesthetic awareness, depth and emergence: A systematic review and meta-analysis
Source: bioRxiv or medRxiv preprint supplement (doi:10.1101/2023.03.14.23287147), 2023-03-15
Supplement: Supplementary file [file media-1.pdf]

**Supplementary table 1.** Further details on study design, and anaesthetic protocols.

| Author (year), country                               | Patient demographics |             |           |                                                                                                                                                        | Specified anaesthetic protocol | Anaesthetic agents                                                                                   | Elective or emergency procedure? | Anaesthetic outcome data |           |           |
|------------------------------------------------------|----------------------|-------------|-----------|--------------------------------------------------------------------------------------------------------------------------------------------------------|--------------------------------|------------------------------------------------------------------------------------------------------|----------------------------------|--------------------------|-----------|-----------|
|                                                      | Population (n)       | Females (n) | Males (n) | Subgroups                                                                                                                                              |                                |                                                                                                      |                                  | Depth of anaesthesia     | Emergence | Awareness |
| <b>Randomised trials</b>                             |                      |             |           |                                                                                                                                                        |                                |                                                                                                      |                                  |                          |           |           |
| Arya, et al. <sup>58</sup> (2013), India             | 70                   | 35          | 35        | SP: n=35, 18♀<br>BIS: n=35, 17♀                                                                                                                        | Yes                            | Induction: propofol + fentanyl                                                                       | Elective                         | +                        | --        | --        |
| Avidan, et al. <sup>57</sup> (2011), USA             | 5713                 | 2413        | 3300      | BIS: n=2861, 1240♀<br>ETAG: n=2852, 1173♀                                                                                                              | Yes                            | Maintenance: volatiles (isoflurane, desflurane or sevoflurane)                                       | Elective                         | --                       | --        | +         |
| Avidan, et al. <sup>56</sup> (2008), USA             | 1941                 | 902         | 1039      | BIS: n=967, 451♀<br>ETAG: n=974, 451♀                                                                                                                  | Yes                            | Maintenance: volatiles (isoflurane, desflurane or sevoflurane)                                       | Elective                         | --                       | --        | +         |
| Celebioglu, et al. <sup>55</sup> (2002), Turkey      | 59                   | 20          | 39        | Droperidol: n=30, 12♀<br>Sevoflurane: n=29, 8♀                                                                                                         | Yes                            | Induction: diazepam, etomidate, fentanyl<br>Maintenance on CPB: sevoflurane OR droperidol + fentanyl | Elective                         | --                       | --        | +         |
| Deogaonkar, et al. <sup>54</sup> (2011), USA         | 107                  | 46          | 61        | A: n=30, 14♀<br>B: n=20, 13♀<br>C: n=28, 10♀<br>D: n=29, 9♀                                                                                            | Yes                            | Induction: thiopentone + opioid<br>Maintenance: isoflurane/N <sub>2</sub> O ± opioid                 | Elective                         | --                       | +         | --        |
| Gan, et al. <sup>53</sup> (1999), USA                | 274                  | 178         | 96        | Control: n=34; 16♀<br>SP: n=124; 84♀<br>BIS: n=115; 78♀                                                                                                | Yes                            | Induction / maintenance: propofol, alfentanil<br>Maintenance: propofol + 50% N <sub>2</sub> O        | Elective                         | --                       | +         | --        |
| Goto, et al. <sup>52</sup> (2002), Japan             | 48                   | 24          | 24        | Xenon 45%: n=4, 4♀<br>Xenon 50%: n=8, 4♀<br>Xenon 55%: n=8, 4♀<br>Xenon 60%: n=8, 4♀<br>Xenon 65%: n=8, 4♀<br>Xenon 70%: n=8, 4♀<br>Xenon 75%: n=4, 0♀ | Yes                            | Induction / maintenance: xenon                                                                       | Elective                         | +                        | --        | --        |
| Greif, et al. <sup>51</sup> (2002), USA <sup>b</sup> | 20                   | 10          | 10        | Placebo: n=20, 10♀<br>Auricular acupuncture: n=20, 10♀                                                                                                 | Yes                            | Induction: propofol<br>Maintenance: Desflurane, 70% N <sub>2</sub> O                                 | Nil procedure                    | +                        | --        | --        |
| Hall, et al. <sup>50</sup> (2002), USA <sup>b</sup>  | 22                   | 10          | 12        | N <sub>2</sub> O: 22, 10♀<br>Sevoflurane: 22, 10♀                                                                                                      | Yes                            | Sedation: sevoflurane OR N <sub>2</sub> O                                                            | Nil procedure                    | --                       | --        | +         |
| Kato, et al. <sup>49</sup> (1993), Japan             | 39                   | 20          | 19        | Sevoflurane: n=21, 11♀<br>Isoflurane: n=18, 9♀                                                                                                         | Yes                            | Maintenance: isoflurane or sevoflurane                                                               | Elective                         | -                        | +         | --        |
| Khanduja, et al. <sup>48</sup> (2014), India         | 60                   | 48          | 12        | Control: n=30, 24♀<br>Dexmedetomidine: n=30, 24♀                                                                                                       | Yes                            | Induction: thiopentone ± dexmedetomidine<br>Maintenance: isoflurane                                  | Not specified                    | +                        | --        | --        |

|                                                     |      |     |      |                                                                                                                        |     |                                                                                                                                                                                                |               |    |    |    |
|-----------------------------------------------------|------|-----|------|------------------------------------------------------------------------------------------------------------------------|-----|------------------------------------------------------------------------------------------------------------------------------------------------------------------------------------------------|---------------|----|----|----|
| Kodaka, et al. <sup>47</sup> (2005), Japan          | 78   | 40  | 38   | Sevoflurane: n=38, 20♀<br>Propofol: n=40, 20♀                                                                          | Yes | Induction: propofol or sevoflurane                                                                                                                                                             | Elective      | +  | -- | -- |
| Kreuer, et al. <sup>46</sup> (2003), Germany        | 120  | 60  | 60   | SP: n=40, 20♀<br>BIS: n=40, 20♀<br>Nacrotrend: n=40, 20♀                                                               | Yes | Induction / maintenance: propofol-remifentanil                                                                                                                                                 | Elective      | -- | +  | -- |
| Lallemant, et al. <sup>45</sup> (2003), France      | 30   | 24  | 6    | Etomidate 0.2mg/kg: n=10, 9♀<br>Etomidate 0.4mg/kg: n=10, 6♀<br>Etomidate 0.6mg/kg: n=10, 9♀                           | Yes | Induction: etomidate                                                                                                                                                                           | Elective      | -- | -- | +  |
| Miller, et al. <sup>44</sup> (1996), USA            | 90   | 62  | 28   | Placebo: n=21, 16♀<br>Midazolam 15mcg/kg: n=24, 17♀<br>Midazolam 30mcg/kg: n=23, 13♀<br>Midazolam 45 mcg/kg: n=22, 16♀ | Yes | Induction: midazolam, propofol, alfentanil<br>Maintenance: propofol                                                                                                                            | Elective      | -- | -- | +  |
| Myles, et al. <sup>34</sup> (2004) (multi-national) | 2463 | 927 | 1536 | BIS: n=1225, 471♀<br>SP: n=1238, 454♀                                                                                  | No  | Variety of anaesthetic agents                                                                                                                                                                  | Both          | -- | +  | +  |
| Schneider, et al. <sup>43</sup> (2003), Germany     | 40   | 16  | 24   | Group 1: n=10, 2♀<br>Group 2: n=10, 6♀<br>Group 3: n=10, 2♀<br>Group 4: n=10, 6♀                                       | Yes | Induction/maintenance: Sevoflurane/low dose remifentanil<br>Group 2: Sevoflurane/high dose remifentanil<br>Group 3: Propofol/low dose remifentanil<br>Group 4: Propofol/high dose remifentanil | Elective      | -- | -- | +  |
| Sun, et al. <sup>42</sup> (2008), China             | 360  | 180 | 180  | Midazolam 0.02mg/kg: 180, 90♀<br>Midazolam 0.06mg/kg: 180, 90♀                                                         | Yes | Sedation: midazolam                                                                                                                                                                            | Elective      | +  | -- | -- |
| Tercan, et al. <sup>41</sup> (2005), Turkey         | 160  | 80  | 80   | Desflurane: n=80, 40♀<br>Sevoflurane: n=80, 40♀                                                                        | Yes | Induction: propofol, fentanyl<br>Maintenance: desflurane or sevoflurane + N <sub>2</sub> O                                                                                                     | Elective      | -- | +  | -- |
| Wang, et al. <sup>40</sup> (2019), China            | 32   | 16  | 16   | Esketamine: n=16, 8♀<br>Ketamine: n=16, 8♀                                                                             | Yes | Sedation: ketamine                                                                                                                                                                             | Not specified | -- | +  | -- |
| Ward, et al. <sup>39</sup> (2002), USA <sup>b</sup> | 12   | 6   | 6    | IDD-D: n=11, 6♀<br>Diprivan: n=12, 6♀                                                                                  | Yes | Induction / maintenance: propofol                                                                                                                                                              | Nil procedure | -- | +  | -- |

|                                                            |      |      |      |                                                                                                                                            |            |     |                                                                                               |               |    |    |    |
|------------------------------------------------------------|------|------|------|--------------------------------------------------------------------------------------------------------------------------------------------|------------|-----|-----------------------------------------------------------------------------------------------|---------------|----|----|----|
| Xiong, et al. <sup>38</sup><br>(2019), China               | 120  | 60   | 60   | Placebo: n=30, 15♀<br>Dexmedetomidine<br>ng/mL: n=30, 15♀<br>Dexmedetomidine<br>ng/mL: n=30, 15♀<br>Dexmedetomidine<br>0.8ng/mL: n=30, 15♀ | 0.4<br>0.6 | Yes | Induction: propofol,<br>dexmedetomidine<br>Maintenance: propofol                              | Not specified | +  | -- | -- |
| Zhang, et al. <sup>37</sup><br>(2011) (China)              | 5173 | 2208 | 2965 | BIS: n=2919, 1237♂<br>SP: n=2309, 971♂                                                                                                     |            | Yes | Induction / maintenance:<br>propofol                                                          | Not specified | -- | -- | +  |
| <b>Other interventional trials</b>                         |      |      |      |                                                                                                                                            |            |     |                                                                                               |               |    |    |    |
| Bajaj, et al. <sup>76</sup><br>(2007), India               | 120  | 60   | 60   | --                                                                                                                                         |            | Yes | Induction: fentanyl,<br>propofol, midazolam<br>Maintenance: propofol,<br>50% N <sub>2</sub> O | Elective      | -- | +  | -- |
| Bell, et al. <sup>75</sup><br>(1987), UK                   | 794  | 379  | 415  | --                                                                                                                                         |            | Yes | Sedation: midazolam                                                                           | Not specified | +  | -- | -- |
| Choi, et al. <sup>74</sup><br>(2016), Korea                | 40   | 20   | 20   | --                                                                                                                                         |            | Yes | Induction:<br>dexmedetomidine,<br>propofol                                                    | Not specified | +  | -- | -- |
| Heggy, et al. <sup>73</sup><br>(2020), Egypt               | 200  | 90   | 110  | --                                                                                                                                         |            | Yes | Induction: propofol or<br>thiopentone<br>Maintenance: isoflurane<br>or sevoflurane            | Elective      | -- | -- | +  |
| Hoymork, et al. <sup>72</sup><br>(2005),<br>Norway         | 60   | 30   | 30   | --                                                                                                                                         |            | Yes | Induction / maintenance:<br>propofol                                                          | Not specified | -- | +  | -- |
| Hoymork, et al. <sup>70</sup><br>(2003)<br>(Norway)        | 21   | 14   | 7    | --                                                                                                                                         |            | Yes | Induction / maintenance:<br>propofol-remifentanil                                             | Not specified | -- | +  | -- |
| Hoymork, et al. <sup>71</sup><br>(2000),<br>Norway         | 18   | 9    | 9    | --                                                                                                                                         |            | Yes | Induction / maintenance:<br>propofol-remifentanil                                             | Not specified | -- | +  | -- |
| Im, et al. <sup>69</sup><br>(2011), Korea                  | 135  | 71   | 64   | 18-29 y: n=45, 22♀<br>30-39 y: n=45, 23♀<br>40-54 y: n=45, 25♀                                                                             |            | Yes | Induction / maintenance:<br>propofol-remifentanil                                             | Elective      | -- | +  | -- |
| Kerssens, et al. <sup>68</sup><br>(2003),<br>Netherlands   | 56   | 25   | 31   | --                                                                                                                                         |            | Yes | Induction / maintenance:<br>propofol                                                          | Elective      | -- | -- | +  |
| Kodaka, et al. <sup>67</sup><br>(2006), Japan <sup>b</sup> | 35   | 17   | 18   |                                                                                                                                            |            | Yes | Induction / maintenance:<br>propofol                                                          | Elective      | +  | -- | -- |
| Li, et al. <sup>66</sup><br>(2021), China                  | 390  | 333  | 57   | Low sevoflurane: n=69,<br>27♂<br>High sevoflurane: n=78,<br>30♂                                                                            |            | Yes | Induction/maintenance:<br>sevoflurane, sufentanil                                             | Elective      | +  | -- | +  |
| Messahel, et al. <sup>65</sup><br>(2007), Saudi<br>Arabia  | 2328 | 1239 | 1089 | --                                                                                                                                         |            | Yes | Induction: fentanyl,<br>thiopentone                                                           | Not specified | -- | -- | +  |

|                                                       |      |      |      |    |     |  |                                                                                                              |               |    |    |    |  |
|-------------------------------------------------------|------|------|------|----|-----|--|--------------------------------------------------------------------------------------------------------------|---------------|----|----|----|--|
|                                                       |      |      |      |    |     |  | Maintenance: isoflurane or sevoflurane + N <sub>2</sub> O                                                    |               |    |    |    |  |
| Riphaus, et al. <sup>77</sup> (2017), Germany         | 219  | 108  | 111  | -- | Yes |  | Sedation: propofol                                                                                           | Both          | -- | +  | -- |  |
| Schneider, et al. <sup>64</sup> (2002), Germany       | 20   | 6    | 14   | -- | Yes |  | Induction: alfentanil, propofol<br>Maintenance: propofol                                                     | Elective      | -- | -- | +  |  |
| Schultz, et al. <sup>63</sup> (2008), Germany         | 20   | 10   | 10   | -- | Yes |  | Induction / maintenance: propofol-remifentanil                                                               | Not specified | +  | -- | -- |  |
| Wadhwa, et al. <sup>62</sup> (2003), USA              | 34   | 17   | 17   | -- | Yes |  | Maintenance: desflurane                                                                                      | Elective      | +  | -- | -- |  |
| Yen, et al. <sup>61</sup> (2011), Taiwan              | 60   | 30   | 30   | -- | Yes |  | Sedation: midazolam, alfentanil                                                                              | Elective      | +  | -- | -- |  |
| Yeo, et al. <sup>60</sup> (2017), Korea               | 97   | 49   | 48   | -- | Yes |  | Sedation: midazolam, ketamine                                                                                | Not specified | +  | -- | -- |  |
| Yu, et al. <sup>59</sup> (2017) (China)               | 1244 | 546  | 698  | -- | Yes |  | Maintenance: CIIA group: sevoflurane + propofol<br>TIVA group: propofol                                      | Not specified | -- | -- | +  |  |
| <b>Prospective, observational studies</b>             |      |      |      |    |     |  |                                                                                                              |               |    |    |    |  |
| Buchanan, et al. <sup>94</sup> (2011), Australia      | 500  | 247  | 253  | -- | No  |  | Induction: propofol or thiopentone<br>Maintenance: isoflurane, desflurane or enflurane, +/- N <sub>2</sub> O | Elective      | -- | +  | -- |  |
| Eger, et al. <sup>9</sup> (2003), multi-national      | 4945 | 1929 | 3016 | -- | No  |  | Maintenance: desflurane, ether, halothane, methoxyflurane, sevoflurane or xenon                              | Not specified | +  | -- | -- |  |
| Ekman, et al. <sup>93</sup> (2004), Sweden            | 4945 | 1929 | 3016 | -- | No  |  | Variety of anaesthetic agents                                                                                | Not specified | -- | -- | +  |  |
| Errando, et al. <sup>92</sup> (2008), Spain           | 4001 | 2321 | 1680 | -- | No  |  | Variety of anaesthetic agents                                                                                | Both          | -- | -- | +  |  |
| Goldmann, et al. <sup>91</sup> (1987), UK             | 30   | 7    | 23   | -- | No  |  | Induction / maintenance: fentanyl, halothane, N <sub>2</sub> O                                               | Elective      | -- | -- | +  |  |
| Haensch, et al. <sup>90</sup> (2009) Germany          | 656  | 417  | 239  | -- | No  |  | Induction / maintenance: propofol                                                                            | Elective      | +  | +  | -- |  |
| Hou, et al. <sup>89</sup> (2019) (China)              | 5404 | 2673 | 2731 | -- | No  |  | Variety of anaesthetic agents                                                                                | Not specified | -- | -- | +  |  |
| Lennertz, et al. <sup>17</sup> (2022), multi-national | 338  | 232  | 106  | -- | No  |  | Variety of anaesthetic agents                                                                                | Not specified | -- | -- | +  |  |

|                                                            |        |        |      |    |    |                                               |               |    |    |    |
|------------------------------------------------------------|--------|--------|------|----|----|-----------------------------------------------|---------------|----|----|----|
| Liu, et al. <sup>88</sup> (1991), UK                       | 1000   | 624    | 376  | -- | No | Variety of anaesthetic agents                 | Not specified | -- | -- | +  |
| Myles, et al. <sup>87</sup> (2001), Australia              | 463    | 222    | 241  | -- | No | Variety of anaesthetic agents                 | Elective      | -- | +  | -- |
| Nordstrom, et al. <sup>86</sup> (1997), Sweden             | 1000   | 718    | 282  | -- | No | Induction / maintenance: propofol, alfentanil | Not specified | -- | -- | +  |
| Ranta, et al. <sup>85</sup> (1998), Finland                | 2612   | 2004   | 608  | -- | No | Variety of anaesthetic agents                 | Elective      | -- | -- | +  |
| Sanders, et al. <sup>18</sup> (2017), 2017, multi-national | 260    | 124    | 136  | -- | No | Variety of anaesthetic agents                 | Not specified | -- | -- | +  |
| Sandin, et al. <sup>4</sup> (2000), Sweden                 | 11,785 | 7053   | 4732 |    | No | Variety of anaesthetic agents                 | Both          | -- | -- | +  |
| Sebel, et al. <sup>20</sup> (2004), USA                    | 19,757 | 11,310 | 8447 | -- | No | Variety of anaesthetic agents                 | Elective      | -- | -- | +  |
| Singla, et al. <sup>84</sup> (2017), India                 | 896    | 604    | 292  | -- | No | Variety of anaesthetic agents                 | Elective      | -- | -- | +  |
| Stait, et al. <sup>83</sup> (2008), Australia              | 200    | 118    | 82   | -- | No | Variety of anaesthetic agents                 | Elective      | -- | -- | +  |
| Tamire, et al. <sup>82</sup> (2019), Ethiopia              | 1065   | 773    | 292  | -- | No | Variety of anaesthetic agents                 | Both          | -- | -- | +  |
| Wang, et al. <sup>81</sup> (2011), China                   | 32     | 16     | 16   | -- | No | Variety of anaesthetic agents                 | Not specified | -- | -- | +  |
| Wennervirta, et al. <sup>80</sup> (2002), Finland          | 3841   | 2950   | 891  | -- | No | Variety of anaesthetic agents                 | Elective      | -- | -- | +  |
| Wilson, et al. <sup>79</sup> (1975), USA                   | 490    | 318    | 172  | -- | No | Variety of anaesthetic agents                 | Elective      | -- | -- | +  |
| Xu, et al. <sup>78</sup> (2009), China                     | 11,101 | 6022   | 5079 | -- | No | Variety of anaesthetic agents                 | Elective      | -- | -- | +  |

**Abbreviations:** BIS, Bispectral index; CIIA, combined intravenous and inhaled anaesthesia; CPB, cardiopulmonary bypass; dexmed, dexmedetomidine; ETAG, end-tidal anaesthetic gas concentration; RCT, randomised control trial; SP, standard practice; TIVA, total intravenous anaesthesia; UK, United Kingdom; USA, United States of America.

+ = related data present; -- = related data not present.

<sup>a</sup> Nested with data reported in Buchanan et al. (2006) and Leslie et al. (2005) papers

<sup>b</sup> Cross-over study or cross-over pairs within study

## Supplementary table 2. Database Search Strategy m

| DATABASE: Embase Classic+Embase <1947 to 2022 August 19>                                                                                                  |                                                                                                                                                                                                                                                                                                       |                          |
|-----------------------------------------------------------------------------------------------------------------------------------------------------------|-------------------------------------------------------------------------------------------------------------------------------------------------------------------------------------------------------------------------------------------------------------------------------------------------------|--------------------------|
| #                                                                                                                                                         | Query                                                                                                                                                                                                                                                                                                 | Results from 22 Aug 2022 |
| 1                                                                                                                                                         | exp general anesthesia/                                                                                                                                                                                                                                                                               | 110,142                  |
| 2                                                                                                                                                         | exp propofol/                                                                                                                                                                                                                                                                                         | 64,336                   |
| 3                                                                                                                                                         | <a href="#">barbiturates.mp.</a> or exp barbituric acid derivative/                                                                                                                                                                                                                                   | 174,860                  |
| 4                                                                                                                                                         | <a href="#">benzodiazepines.mp.</a> or exp benzodiazepine derivative/                                                                                                                                                                                                                                 | 259,708                  |
| 5                                                                                                                                                         | exp halothane/ or exp nitrous oxide/ or exp inhalation anesthesia/ or exp isoflurane/ or exp desflurane/ or exp sevoflurane/ or exp inhalation anesthetic agent/ or exp enflurane/                                                                                                                    | 189,905                  |
| 6                                                                                                                                                         | exp ketamine/                                                                                                                                                                                                                                                                                         | 51,877                   |
| 7                                                                                                                                                         | exp xenon/                                                                                                                                                                                                                                                                                            | 9,048                    |
| 8                                                                                                                                                         | Adrenergic alpha-Agonists.mp. or exp alpha adrenergic receptor stimulating agent/                                                                                                                                                                                                                     | 467,662                  |
| 9                                                                                                                                                         | exp intravenous anesthetic agent/ or exp intravenous anesthesia/                                                                                                                                                                                                                                      | 13,919                   |
| 10                                                                                                                                                        | <a href="#">emergence.mp.</a>                                                                                                                                                                                                                                                                         | 154,626                  |
| 11                                                                                                                                                        | depth of <a href="#">anaesthesia.mp.</a> or exp anesthesia level/                                                                                                                                                                                                                                     | 8,270                    |
| 12                                                                                                                                                        | exp anesthetic recovery/                                                                                                                                                                                                                                                                              | 8,648                    |
| 13                                                                                                                                                        | exp unconsciousness/ or loss of <a href="#">consciousness.mp.</a>                                                                                                                                                                                                                                     | 97,551                   |
| 14                                                                                                                                                        | exp awareness/ or exp intraoperative awareness/ or isolated forearm <a href="#">technique.mp.</a> [mp=title, abstract, heading word, drug trade name, original title, device manufacturer, drug manufacturer, device trade name, keyword heading word, floating subheading word, candidate term word] | 116,416                  |
| 15                                                                                                                                                        | 4 or 8                                                                                                                                                                                                                                                                                                | 693,513                  |
| 16                                                                                                                                                        | 1 and 15                                                                                                                                                                                                                                                                                              | 14,227                   |
| 17                                                                                                                                                        | 2 or 3 or 5 or 6 or 7 or 9 or 16                                                                                                                                                                                                                                                                      | 432,138                  |
| 18                                                                                                                                                        | 10 or 11 or 12 or 13 or 14                                                                                                                                                                                                                                                                            | 380,165                  |
| 19                                                                                                                                                        | 17 and 18                                                                                                                                                                                                                                                                                             | 20,214                   |
| DATABASE: Ovid MEDLINE(R) and Epub Ahead of Print, In-Process, In-Data-Review & Other Non-Indexed Citations, Daily and Versions <1946 to August 01, 2022> |                                                                                                                                                                                                                                                                                                       |                          |
| #                                                                                                                                                         | Query                                                                                                                                                                                                                                                                                                 | Results from 2 Aug 2022  |
| 1                                                                                                                                                         | exp Anesthesia, General/                                                                                                                                                                                                                                                                              | 61,144                   |
| 2                                                                                                                                                         | exp Propofol/                                                                                                                                                                                                                                                                                         | 16,188                   |
| 3                                                                                                                                                         | exp Barbiturates/                                                                                                                                                                                                                                                                                     | 54,129                   |
| 4                                                                                                                                                         | exp Benzodiazepines/                                                                                                                                                                                                                                                                                  | 68,414                   |
| 5                                                                                                                                                         | exp Anesthetics, Inhalation/                                                                                                                                                                                                                                                                          | 55,870                   |
| 6                                                                                                                                                         | exp Xenon/                                                                                                                                                                                                                                                                                            | 7,989                    |
| 7                                                                                                                                                         | exp Nitrous Oxide/                                                                                                                                                                                                                                                                                    | 15,241                   |
| 8                                                                                                                                                         | exp Ketamine/                                                                                                                                                                                                                                                                                         | 14,267                   |
| 9                                                                                                                                                         | exp Adrenergic alpha-Agonists/                                                                                                                                                                                                                                                                        | 166,202                  |

|    |                                                                   |         |
|----|-------------------------------------------------------------------|---------|
| 10 | exp Anesthetics, Intravenous/                                     | 84,102  |
| 11 | <a href="#">emergence.mp.</a>                                     | 129,920 |
| 12 | depth of <a href="#">anaesthesia.mp.</a>                          | 750     |
| 13 | depth of <a href="#">anesthesia.mp.</a>                           | 1,347   |
| 14 | eye <a href="#">opening.mp.</a>                                   | 2,160   |
| 15 | exp Orientation/                                                  | 28,554  |
| 16 | <a href="#">recovery.mp.</a> or exp Anesthesia Recovery Period/   | 555,764 |
| 17 | loss of <a href="#">consciousness.mp.</a> or exp Unconsciousness/ | 48,954  |
| 18 | exp Intraoperative Awareness/ or exp Awareness/                   | 21,881  |
| 19 | 1 or 2 or 3 or 4 or 5 or 6 or 7 or 8 or 9 or 10                   | 413,282 |
| 20 | 11 or 14 or 15 or 16                                              | 711,669 |
| 21 | 12 or 13 or 17                                                    | 50,946  |
| 22 | 18 or 20 or 21                                                    | 779,498 |
| 23 | 19 and 22                                                         | 22,949  |
| 24 | limit 23 to humans                                                | 16,573  |

**Supplementary table 3.** Further individual study data on outcome measures

| Reference                               | Awareness parameters                                                           | Outcomes                                                      | Related variables <sup>a</sup>                                        |                                                                               |                                |                                               |
|-----------------------------------------|--------------------------------------------------------------------------------|---------------------------------------------------------------|-----------------------------------------------------------------------|-------------------------------------------------------------------------------|--------------------------------|-----------------------------------------------|
|                                         |                                                                                |                                                               | Age (y)                                                               | Drug dosage                                                                   | Duration of anaesthesia/ (min) | of surgery                                    |
| <b>Awareness</b>                        |                                                                                |                                                               |                                                                       |                                                                               |                                |                                               |
| Avidan, et al. <sup>57</sup> (2011)     | Incidence of awareness with recall (modified Brice questionnaire)              | • Confirmed (n) = 27 (F:M 12:15)                              | BIS: 60 ± 14.2<br>ETAC: 61 ± 14.4                                     | Median age-adjusted MAC: 0.9                                                  | NR                             |                                               |
| Avidan, et al. <sup>56</sup> (2008)     | Incidence of awareness with recall (modified Brice questionnaire)              | • Confirmed (n) = 4 (F:M 1:3)<br>• Possible (n) = 5 (F:M 2:3) | BIS: 59.5 ± 14.8<br>ETAG: 59.2 ± 14.6                                 | Mean time-averaged ETAG: BIS: 0.8 ± 0.25<br>MAC<br>ETAG: 0.8 ± 0.23<br>MAC    | NR                             |                                               |
| Celebioglu, et al. <sup>55</sup> (2002) | Incidence of awareness with recall (modified Brice questionnaire)              | • Confirmed (n) = 5 (F:M 3:2)                                 | Droperidol: 54 ± 16<br>Sevoflurane: 51 ± 15                           | NR                                                                            |                                | Droperidol: 265 ± 50<br>Sevoflurane: 274 ± 69 |
| Ekman, et al. <sup>93</sup> (2004)      | Incidence of awareness with recall (modified Brice questionnaire)              | • Confirmed (n) = 2 (F:M 1:1)                                 | SP: 49 ± 19<br>BIS: 50 ± 19                                           | NR                                                                            |                                | SP: 114 ± 72<br>BIS: 121 ± 72                 |
| Errando, et al. <sup>92</sup> (2008)    | Incidence of awareness with recall (modified Brice questionnaire)              | • Confirmed (n) = 22 (F:M 18:4)                               | 51 ± 18                                                               | NR                                                                            |                                | 120 ± 51                                      |
| Goldmann, et al. <sup>91</sup> (1987)   | Incidence of awareness with recall (structured interview)                      | • Confirmed (n) = 7 (F:M 0:7)                                 | 55.6                                                                  | NR                                                                            |                                | NR                                            |
| Hall, et al. <sup>50</sup> (2002)       | Recall/recognition scores of audio/visual prompts displayed during anaesthetic | Scores 10-20% poorer in M (LR chi-square < 0.004)             | 29 ± 7                                                                | NR                                                                            |                                | NR                                            |
| Heggy, et al. <sup>73</sup> (2020)      | Incidence of awareness with recall (modified Brice questionnaire)              | • Confirmed (n) = 1 (F:M 0:1)                                 | 44                                                                    | NR                                                                            |                                | NR                                            |
| Hou, et al. <sup>89</sup> (2019)        | Incidence of awareness with recall (modified Brice questionnaire)              | • Confirmed (n) = 23 (F:M 9:14)                               | 52.6 ± 13.4                                                           | NR                                                                            |                                | Mean NR                                       |
| Kerssens, et al. <sup>68</sup> (2003)   | Incidence of positive intra-operative response using IFT                       | • No gender specific data provided                            | 37 ± 10                                                               | NR                                                                            |                                | Pre-surgical: 39 ± 11<br>Surgical: 45 ± 17    |
|                                         | Incidence of awareness with recall (structured interview)                      | • Confirmed (n) = 9 (F:M 5:4)                                 |                                                                       |                                                                               |                                |                                               |
| Lallemand, et al. <sup>45</sup> (2003)  | Incidence of awareness with recall (structured interview)                      | • Confirmed (n) = 0                                           | Group 1: 52 (38-68)<br>Group 2: 51 (35-78)<br>Group 3: age 47 (32-57) | Etomidate dose<br>Group 1: 0.2mg/kg<br>Group 2: 0.4mg/kg<br>Group 3: 0.6mg/kg | NR                             |                                               |
| Lennertz, et al. <sup>17</sup> (2022)   | Incidence of positive intra-operative response using IFT                       | • Responders: 11% (37/232; F:M 31:6)                          | 30 ± 6.3                                                              | NR                                                                            |                                | NR                                            |
|                                         | Incidence of awareness with recall (structured interview)                      | • Confirmed awareness (n) = 1 (F:M 1:0)                       |                                                                       |                                                                               |                                |                                               |



|                                        |                                                                                                                               |                                                                    |                                                                                                  |          |                                                                             |
|----------------------------------------|-------------------------------------------------------------------------------------------------------------------------------|--------------------------------------------------------------------|--------------------------------------------------------------------------------------------------|----------|-----------------------------------------------------------------------------|
|                                        |                                                                                                                               | • Possible awareness (n) = 5 (F:M 3:2)                             |                                                                                                  |          |                                                                             |
| Li, et al. <sup>66</sup> (2021)        | Incidence of awareness with recall (structured interview)                                                                     | • Confirmed awareness (n) = 0                                      | Low sevoflurane: 51.32 ± 1.1<br>High sevoflurane: 49.46 ± 1.11                                   | NR       | Low sevoflurane: 214.14 ± 9.2<br>High sevoflurane: 2185 ± 9.0               |
| Liu, et al. <sup>88</sup> (1991)       | Incidence of awareness with recall (structured interview)                                                                     | • Confirmed (n) = 2 (F:M 1:1)                                      | NR                                                                                               | NR       | NR                                                                          |
| Messahel, et al. <sup>65</sup> (2007)  | Incidence of awareness with recall (structured interview)                                                                     | • Confirmed (n) = 0                                                | 38.6 (14-104)                                                                                    | NR       | NR                                                                          |
| Miller, et al. <sup>44</sup> (1996)    | Incidence of awareness with recall (structured interview)                                                                     | • Confirmed (n) = 6 (F:M 6:0)                                      | Placebo: 34 ± 11<br>Group 2: 35 ± 9<br>Group 3: 35 ± 9<br>Group 4: age 38 ± 12                   | Propofol | Placebo: 37 ± 9<br>Group 2: 37 ± 12<br>Group 3: 40 ± 14<br>Group 4: 41 ± 15 |
| Myles, et al. <sup>34</sup> (2004)     | Incidence of awareness with recall (modified Brice questionnaire)                                                             | • Confirmed (n) = 13 (F:M 6:7)<br>• Possible (n) = 37 (F:M 18:19)  | BIS: 58.1 ± 16.5<br>SP: 57.5 ± 16.9                                                              | NR       | BIS: 192 (90-264)<br>SP: 186 (78-270)                                       |
| Nordstrom, et al. <sup>86</sup> (1997) | Incidence of awareness with recall (structured interview)                                                                     | • Confirmed (n) = 2 (F:M 2:0)                                      | 42 ± 15                                                                                          | NR       | 56 ± 45                                                                     |
| Ranta, et al. <sup>85</sup> (1998)     | Incidence of awareness with recall (modified Brice questionnaire)                                                             | • Confirmed (n) = 10 (F:M 8:2)<br>• Possible (n) = 9 (F:M 9:0)     | NR                                                                                               | NR       | NR                                                                          |
| Sanders, et al. <sup>18</sup> (2017)   | Incidence of positive intra-operative response using IFT<br>Incidence of awareness with recall (modified Brice questionnaire) | • Responders: 4.6% (12/260; F:M 7:5)<br>• Confirmed (n) = 0        | 29 ± 7                                                                                           | NR       | NR                                                                          |
| Sandin, et al. <sup>4</sup> (2000)     | Incidence of awareness with recall (modified Brice questionnaire)                                                             | • Confirmed (n) = 19 (F:M 12:7)                                    | 48 ± 19                                                                                          | NR       | 99 ± 65                                                                     |
| Schneider, et al. <sup>43</sup> (2003) | Incidence of awareness with recall (modified Brice questionnaire)                                                             | • Confirmed (n) = 0                                                | Group 1: 35 y (22-54)<br>Group 2: 53 y (22-72)<br>Group 3: 44 y (28-66)<br>Group 4: 51 y (21-79) | NR       | NR                                                                          |
| Schneider, et al. <sup>67</sup>        | Incidence of positive intra-operative response using IFT                                                                      | • Responders: 40% (8/20; F:M 3:5)                                  | Responders: 40 ± 15<br>Non-responders: 45 ± 17                                                   | NR       | NR                                                                          |
| Sebel, et al. <sup>20</sup> (2004)     | Incidence of awareness with recall (modified Brice questionnaire)                                                             | • Confirmed (n) = 25 (F:M 16:9)<br>• Possible (n) = 46 (F:M 27:19) | Responders: 52 ± 15<br>Possible responders: 48 ± 14<br>Non-responders: 48 ± 14                   | NR       | NR                                                                          |
| Singla, et al. <sup>84</sup> (2017)    | Incidence of awareness with recall (modified Brice questionnaire)                                                             | • Confirmed (n) = 3 (F:M 2:1)                                      | Mean NR                                                                                          | NR       | NR                                                                          |

|                                          |                                                                   |                                                                                                         |                                                                  |    |                                                                  |
|------------------------------------------|-------------------------------------------------------------------|---------------------------------------------------------------------------------------------------------|------------------------------------------------------------------|----|------------------------------------------------------------------|
|                                          | questionnaire)                                                    | 2:1)<br>• Possible (n) = 4 (F:M 3:1)                                                                    | <30 y 25.89%<br>30-44 y 32.48%<br>45-59 y 25.78%<br>>60 y 15.85% |    |                                                                  |
| Stait, et al. <sup>83</sup> (2008)       | Incidence of awareness with recall (modified Brice questionnaire) | • Confirmed (n) = 8 (F:M 6:2)                                                                           | 58 ± 14                                                          | NR | NR                                                               |
| Tamire, et al. <sup>82</sup> (2019)      | Incidence of awareness with recall (modified Brice questionnaire) | No significant difference                                                                               | 39.39 ± 18.8                                                     | NR | NR                                                               |
| Wang, et al. <sup>81</sup> (2011)        | Incidence of awareness with recall (modified Brice questionnaire) | • Confirmed (n) = 21 (F:M 13:8)<br>• Possible (n) = 205 (F:M 118:87)                                    | 45 ± 14                                                          | NR | No awareness: 148 ± 71<br>Possible/confirmed awareness: 157 ± 82 |
| Wennervirta, et al. <sup>80</sup> (2002) | Incidence of awareness with recall (modified Brice questionnaire) | • Confirmed (n) = 4 (F:M 4:0)<br>• Possible (n) = 7 (F:M 7:0)                                           | Outpatient: 37 ± 6<br>Inpatient: 46 ± 13                         | NR | NR                                                               |
| Wilson, et al. <sup>79</sup> (1975)      | Incidence of awareness with recall (modified Brice questionnaire) | • Confirmed (n) = 4 (F:M 4:0)                                                                           | 44.4 (15-38)                                                     | NR | F: 98.9 (10-300)<br>M: 88.3 (20-310)                             |
| Xu, et al. <sup>78</sup> (2009)          | Incidence of awareness with recall (modified Brice questionnaire) | • Confirmed (n) = 46 (F:M 31:15)                                                                        | 49 ± 16                                                          | NR | <1 h (n) = 1046<br>1-2h (n) = 3778<br>>2h (n) = 6089             |
| Yu, et al. <sup>59</sup> (2017)          | Incidence of awareness with recall (modified Brice questionnaire) | • Confirmed (n) = 14 (F:M 7:7)                                                                          | 53.67 ± 11.67                                                    | NR | 96.69 ± 36.68                                                    |
| Zhang, et al. <sup>37</sup> (2011)       | Incidence of awareness with recall (modified Brice questionnaire) | Awareness with recall (n)<br>• Confirmed BIS group = 4 (F:M 3:1)<br>• Confirmed SP group = 15 (F:M 8:7) | BIS group: 46.95 ± 14.89<br>SP group: 46.06 ± 14.59              | NR | <1 h (n) = 867<br>1-2h (n) = 2147<br>>2h (n) = 1894              |

### Emergence from Anaesthesia

|                                       |                                          |                                           |                                      |                                                                                           |                                    |
|---------------------------------------|------------------------------------------|-------------------------------------------|--------------------------------------|-------------------------------------------------------------------------------------------|------------------------------------|
| Bajaj, et al. <sup>76</sup> (2007)    | Time to eye opening (min)                | • 6.87 ± 2.54 vs 8.78 ± 2.66 (p < 0.001)  | F: 41.05 ± 13.18<br>M: 40.93 ± 13.84 | Mean propofol (mg)                                                                        | F: 72.12 ± 9.82<br>M: 73.37 ± 10.3 |
|                                       | Time to response to verbal command (min) | • 7.53 ± 2.05 vs 9.61 ± 2.14 (p < 0.001)  |                                      | F: 721.45 ± 119.47                                                                        |                                    |
|                                       | Time to extubation (min)                 | • 8.40 ± 1.60 vs 10.79 ± 1.70 (p < 0.001) |                                      | M: 737.63 ± 110.20                                                                        |                                    |
| Buchanan, et al. <sup>94</sup> (2011) | Time to eye opening (min)                | • 5.3 ± 3.5 vs 7.7 ± 4.0 (p < 0.0005)     | F: 39.5 (17-75)<br>M: 39.5 (18-70)   | Mean ETAC (%)                                                                             | F: 70.8 ± 42.5<br>M: 65 ± 43.5     |
|                                       | Time to obeying commands (min)           | • 6.8 ± 7.3 vs 8.3 ± 5.1 (p = 0.01)       |                                      | Desflurane: F, 4.16 ± 0.46; M, 4.53 ± 0.82                                                |                                    |
|                                       | Duration of PACU stay (min)              | • 38.8 ± 16.1 vs 33.7 ± 11.8 (p < 0.001)  |                                      | Sevoflurane: F, 1.43 ± 0.66; M, 1.43 ± 0.64<br>Isoflurane: F, 0.70 ± 0.33; M, 0.73 ± 0.29 |                                    |

|                                         |                                          |                                                                                                                                       |                                                                              | Enflurane: F, 0.77<br>± 15; M, NA                                                                |                                                                                                      |
|-----------------------------------------|------------------------------------------|---------------------------------------------------------------------------------------------------------------------------------------|------------------------------------------------------------------------------|--------------------------------------------------------------------------------------------------|------------------------------------------------------------------------------------------------------|
| Deogaonkar, et al. <sup>54</sup> (2011) | % 'awake' by 30mins post-op              | • 83% vs 57% (p = 0.002)                                                                                                              | Group A: 53 ± 16<br>Group B: 58 ± 15<br>Group C: 52 ± 15<br>Group D: 54 ± 16 | NR                                                                                               | Group A: 300 (228-366)<br>Group B: 276 (222-600)<br>Group C: 354 (294-390)<br>Group D: 306 (246-420) |
| Gan, et al. <sup>53</sup> (1999)        | Time to eye opening                      | • 7.0 ± 5.2 vs 11.2 ± 8.6 (p <0.05)                                                                                                   | F: 40 ± 13<br>M: 41 ± 15                                                     | Propofol dose (mg/kg/min)<br>F: 0.13 ± 0.3<br>M: 0.13 ± 0.3                                      | F: 120 ± 63.6<br>M: 108 ± 46.2                                                                       |
|                                         | Time to response to verbal command (min) | • 8.1 ± 6.2 vs 11.7 ± 8.6 (p <0.05)                                                                                                   |                                                                              |                                                                                                  |                                                                                                      |
| Haensch, et al. <sup>90</sup> (2009)    | Time to extubation (min)                 | • 10.59 ± 4.90 vs 12.20 ± 5.16 (p <0.0001)                                                                                            | F: 53.4 ± 14.8<br>M: 50.5 ± 16.2                                             | NR                                                                                               | F: 98.3 ± 43.5<br>M: 103.7 ± 47.1                                                                    |
| Hoymork, et al. <sup>72</sup> (2005)    | Time to response to verbal command (min) | • 5.6 ± 2.4 vs 18.2 ± 3.7 (p = 0.003)                                                                                                 | F: 33.6 (22-47)<br>M: 36.5 (22-60)                                           | Propofol dose (mg/kg/min)<br>F: 0.18 ± 0.03<br>M: 0.17 ± 0.03                                    | F: 99 ± 36<br>M: 97 ± 43                                                                             |
| Hoymork, et al. <sup>70</sup> (2003)    | Time to response to verbal command (min) | • 6.6 ± 3.5 vs 11.6 ± 3.2 (p <0.01)                                                                                                   | F: 36.5 (23-53)<br>M: 41.3 (25-50)                                           | NR                                                                                               | 67 (41-125)                                                                                          |
| Hoymork, et al. <sup>71</sup> (2000)    | Time to response to verbal command (min) | • 12.6 ± 2.5 vs 19.0 ± 4.2 (p = 0.001)                                                                                                | 44.8 ± 12.0                                                                  | NR                                                                                               | NR                                                                                                   |
| Im, et al. <sup>69</sup> (2011)         | Time to eye opening (min)                | • 18-29 y: 9.9 ± 4.2 vs 12 ± 4.0 (NS)<br>• 30-39 y: 9.93 ± 2.7 vs 11.8 ± 5.1 (NS)<br>• 40-54 y: 9.4 ± 2.9 vs 12.9 ± 2.6 (p <0.05)     | Age mean NR                                                                  | Propofol dose (mg)<br>18-29 y: 588.8 ± 275.9<br>30-39 y: 609.2 ± 217.5<br>40-54 y: 567.8 ± 195.9 | 18-29 y: 75.1 ± 36.4<br>30-39 y: 77.7 ± 30.8<br>40-54 y: 71.9 ± 22.4                                 |
|                                         | Time to orientation (min)                | • 18-29 y: 11.2 ± 4.2 vs 13.2 ± 4.1 (NS)<br>• 30-39 y: 10.9 ± 3.1 vs 13.2 ± 5.2 (NS)<br>• 40-54 y: 11.6 ± 3.7 vs 14.4 ± 2.9 (p <0.05) |                                                                              |                                                                                                  |                                                                                                      |
| Katoh, et al. <sup>49</sup> (1993)      | Awakening concentration (%) of volatile  | • Non-significant difference                                                                                                          | Sevoflurane: 42.9 ± 15.3<br>Isoflurane: 41.9 ± 15.8                          | --                                                                                               | Sevoflurane: 145.1 ± 59.5<br>Isoflurane: 151.4 ± 40.3                                                |
| Kreuer, et al. <sup>46</sup> (2003)     | Time to eye opening (min)                | • SP: 6.9 ± 2.6 vs 11.7 ± 6.1 (p = 0.003)                                                                                             | SP: 46.1 ± 14.5<br>BIS: 43.8 ± 4.2                                           | Propofol dose (mg/kg/h)                                                                          | SP: 108.2 ± 44.2<br>BIS: 121.2 ± 40.9                                                                |

|                                      |                                                       |                                                                                                                                                                                            |                                                                                            |                                                          |                                                                                                 |
|--------------------------------------|-------------------------------------------------------|--------------------------------------------------------------------------------------------------------------------------------------------------------------------------------------------|--------------------------------------------------------------------------------------------|----------------------------------------------------------|-------------------------------------------------------------------------------------------------|
|                                      |                                                       | <ul style="list-style-type: none"> <li>• BIS: 3.1 ± 2.0 vs 3.9 ± 3.6 (NS)</li> <li>• Narcotrend: 2.9 ± 1.8 vs 3.9 ± 2.4 (NS)</li> </ul>                                                    | Narcotrend: 44.8 ± 15.9                                                                    | SP: 6.8 ± 1.2<br>BIS: 4.8 ± 1.0<br>Narcotrend: 4.5 ± 1.1 | Narcotrend: 126.9 ± 67.7                                                                        |
|                                      | Time to extubation (min)                              | <ul style="list-style-type: none"> <li>• SP: 7.4 ± 2.6 vs 12.0 ± 6.3 (p = 0.005)</li> <li>• BIS: 4.7 ± 3.6 vs 3.5 ± 2.0 (NS)</li> <li>• Narcotrend: 3.2 ± 2.2 vs 4.2 ± 2.2 (NS)</li> </ul> |                                                                                            |                                                          |                                                                                                 |
| Myles, et al. <sup>34</sup> (2004)   | Time to eye opening <sup>e</sup> (min)                | <ul style="list-style-type: none"> <li>• 8 vs 10 (median time; p &lt;0.001)</li> <li>• 12 ± 22.6 vs 18 ± 45.9 (p &lt;0.05)</li> </ul>                                                      | BIS: 58.1 ± 16.5<br>SP: 57.5 ± 16.9                                                        | NR                                                       | F: 162 ± 120.6<br>M: 212.4 ± 129.6                                                              |
|                                      | Time to extubation (for patients admitted to ICU) (h) | <ul style="list-style-type: none"> <li>• 12 vs 10 (median time; p = 0.004)</li> </ul>                                                                                                      |                                                                                            |                                                          |                                                                                                 |
|                                      | Duration of PACU stay <sup>f</sup> (min)              | <ul style="list-style-type: none"> <li>• 59 vs 70 (median time; p = 0.004)</li> <li>• 67.4 ± 49.1 vs 85.0 ± 56.8 (p &lt;0.0005)</li> </ul>                                                 |                                                                                            |                                                          |                                                                                                 |
| Myles, et al. <sup>87</sup> (2001)   | Time to eye opening (min)                             | <ul style="list-style-type: none"> <li>• 11.3 (95% CI 10.4-12.32) vs 13.4 (95% CI 12.4 – 14.3) (p = 0.003)</li> </ul>                                                                      | F: 42 ± 15<br>M: 42 ± 28                                                                   | NR                                                       | F: 94 ± 62<br>M: 83 ± 52                                                                        |
|                                      | Time to obeying commands (min)                        | <ul style="list-style-type: none"> <li>• 12.4 (95% CI 11.3 – 13.7) vs 15.3 (95% CI 14.1 – 16.4) (p = 0.02)</li> </ul>                                                                      |                                                                                            |                                                          |                                                                                                 |
|                                      | Duration of PACU stay (min)                           | <ul style="list-style-type: none"> <li>• 66 (95% CI 63 – 70) vs 64 (95% CI 60 – 67) (NS)</li> </ul>                                                                                        |                                                                                            |                                                          |                                                                                                 |
| Riphaus, et al. <sup>77</sup> (2017) | Time to eye opening (min)                             | <ul style="list-style-type: none"> <li>• 7.3 ± 3.7 vs 8.4 ± 3.4 (p &lt;0.01)</li> </ul>                                                                                                    | F: 66.9 ± 16.0<br>M: 64.8 ± 15.1                                                           | Propofol dose (mg/kg)                                    | F: 23.2 ± 12.3<br>M: 23.8 ± 13.9                                                                |
|                                      | Time to orientation (min)                             | <ul style="list-style-type: none"> <li>• 9.1 ± 3.9 vs 10.4 ± 3.7 (p &lt;0.01)</li> </ul>                                                                                                   |                                                                                            | F: 3.98 ± 1.81<br>M: 3.72 ± 1.75                         |                                                                                                 |
| Tercan, et al. <sup>41</sup> (2005)  | Time to eye opening (min)                             | <ul style="list-style-type: none"> <li>• Desflurane: 6.0 ± 1.3 vs 4.9 ± 0.9 (p &lt;0.001)</li> <li>• Sevoflurane: 6.9 ± 1.3 vs 6.1 ± 0.9 (p = 0.001)</li> </ul>                            | Desflurane: F: 44.7 ± 7.6<br>M: 41.5 ± 7.5<br>Sevoflurane: F: 43.5 ± 8.0<br>M: 42.7 ± 10.3 | NR                                                       | Desflurane: F: 118.9 ± 13.8<br>M: 116.4 ± 9.4<br>Sevoflurane: F: 121.6 ± 14.9<br>M: 116.2 ± 9.4 |
|                                      | Time to extubation (min)                              | <ul style="list-style-type: none"> <li>• Desflurane: 3.96 ± 0.6 vs 2.7 ± 0.6 (p &lt;0.001)</li> <li>• Sevoflurane: 4.6 ± 1.2 vs 3.97 ± 0.7 (p = 0.009)</li> </ul>                          |                                                                                            |                                                          |                                                                                                 |
|                                      | Time to orientation (min)                             | <ul style="list-style-type: none"> <li>• Desflurane: 9.7 ± 1.8 vs</li> </ul>                                                                                                               |                                                                                            |                                                          |                                                                                                 |

|                                       |                                                                                                                   |                                                      |                                                      |                                                                    |                                             |
|---------------------------------------|-------------------------------------------------------------------------------------------------------------------|------------------------------------------------------|------------------------------------------------------|--------------------------------------------------------------------|---------------------------------------------|
|                                       |                                                                                                                   | 9.3 ± 1.4 (NS)                                       |                                                      |                                                                    |                                             |
|                                       |                                                                                                                   | • Sevoflurane: 9.6 ± 1.8 vs 9.5 ± 1.1 (NS)           |                                                      |                                                                    |                                             |
| Wang, et al. <sup>81</sup> (2011)     | Time to recovery (OAAS/S score >5) (min)                                                                          | • Esketamine: 9.5 (4-15) vs 8.5 (5-13) (NS)          | Esketamine: 32.0 ± 6.19                              | Esketamine: 0.5 mg/kg                                              | NR                                          |
|                                       |                                                                                                                   | • Racemate ketamine: 14.5 (8-17) vs 11.5 (5-26) (NS) | Ketamine: 40.0 ± 8.91                                | Ketamine: 1 mg/kg                                                  |                                             |
|                                       | Time to orientation (min)                                                                                         | • Esketamine: 11 (6-25) vs 11.5 (6-19) (NS)          |                                                      |                                                                    |                                             |
|                                       |                                                                                                                   | • Racemate ketamine: 17.5 (13-21) vs 16 (6-29) (NS)  |                                                      |                                                                    |                                             |
| Ward, et al. <sup>39</sup> (2002)     | Time to eye opening (sec)                                                                                         | • IDD-D: 931 ± 250 vs 1517 ± 427 (p <0.01)           | IDD-D: 26 ± 8.7                                      | Propofol dose (mg/kg): 8.5                                         | 30 ± 0                                      |
|                                       |                                                                                                                   | • Diprivan: 777 ± 378 vs 1234 ± 352 (p <0.01)        | Diprivan: 26 ± 8.7                                   |                                                                    |                                             |
| <b>Depth of Anaesthesia</b>           |                                                                                                                   |                                                      |                                                      |                                                                    |                                             |
| Arya, et al. <sup>58</sup> (2013)     | Propofol dose for loss of response to verbal command (SP group) (mg/kg)                                           | • 1.65 ± 0.44 vs 2.06 ± 0.45 (p = 0.0002)            | SP: 34.2 ± 10.5<br>BIS: 32.7 ± 12.7                  | --                                                                 | NR                                          |
|                                       | Propofol dose for sustained BIS value of 48 ± 2 (BIS group) (mg/kg)                                               | • 1.75 ± 0.49 vs 1.83 ± 0.32 (NS)                    |                                                      |                                                                    |                                             |
| Bell, et al. <sup>75</sup> (1987)     | Midazolam dose to achieve sedation (drowsy but still able to cooperate) (mg)                                      | • 6.4 vs 7.4 (NS)                                    | 57.5                                                 | --                                                                 | NR                                          |
| Choi, et al. <sup>74</sup> (2016)     | Propofol EC <sub>50</sub> for successful insertion of LMA (mcg/mL)                                                | • 3.82 ± 0.34 vs 5.46 ± 0.26 (p <0.01)               | F: 35 ± 11<br>M: 35 ± 9                              | Propofol mean dose<br>F: 2.77 ± 0.41 mg/kg<br>M: 3.35 ± 0.81 mg/kg | NR                                          |
| Eger, et al. <sup>9</sup> (2003)      | MAC (%) for normalised-combined data <sup>b</sup>                                                                 | • 1.013 ± 0.017 vs 1.005 ± 0.009 (NS)                | NR                                                   | --                                                                 | NR                                          |
| Goto, et al. <sup>52</sup> (2002)     | Xenon ET % for 1 MAC                                                                                              | • 51.1 (44.6-57.6) vs 69.3 (63-75.6)                 | F: 71 ± 5<br>M: 70 ± 3                               | --                                                                 | NR                                          |
| Greif, et al. <sup>51</sup> (2002)    | ET % for 1 MAC                                                                                                    | • Control: 5.5 ± 1.0 vs 4.6 ± 0.6 (p <0.05)          | F: 26 ± 6<br>M: 28 ± 5                               | --                                                                 | Control: 169 ± 40<br>Intervention: 171 ± 49 |
|                                       |                                                                                                                   | • Intervention: 4.7 ± 0.6 vs 4.2 ± 0.6 (NS)          |                                                      |                                                                    |                                             |
| Haensch, et al. <sup>90</sup> (2009)  | Propofol dose during steady state anaesthesia (D <sub>2</sub> /E <sub>0</sub> on EEG) <sup>c</sup> (mg/kg/ LBM/h) | • Control: 3.92 ± 0.324 vs 3.69 ± 0.230              | F: 53.4 ± 14.8<br>M: 50.5 ± 16.2                     | --                                                                 | F: 98.3 ± 43.5<br>M: 103.7 ± 47.1           |
|                                       |                                                                                                                   | • Dexmedetomidine: 2.55 ± 0.184 vs 2.76 ± 0.467      |                                                      |                                                                    |                                             |
| Khanduja, et al. <sup>48</sup> (2014) | Mean thiopentone dose for induction (loss of eyelash reflex) with or without dexmedetomidine (mg/kg)              | • Control: 3.92 ± 0.324 vs 3.68 ± 0.230              | Control: 40.4 ± 11.1<br>Dexmedetomidine: 42.4 ± 12.1 | --                                                                 | NR                                          |
|                                       |                                                                                                                   | • Dexmedetomidine: 2.55 ± 0.184 vs 2.76 ± 0.467      |                                                      |                                                                    |                                             |

|                                      |                                                                           |                                                                                                                                                                                                                                  |                                                                                                                                                                                      |                                                    |                                                               |
|--------------------------------------|---------------------------------------------------------------------------|----------------------------------------------------------------------------------------------------------------------------------------------------------------------------------------------------------------------------------|--------------------------------------------------------------------------------------------------------------------------------------------------------------------------------------|----------------------------------------------------|---------------------------------------------------------------|
| Kodaka, et al. <sup>67</sup> (2006)  | Measured and predicted propofol P <sub>50</sub> for LOC (mcg/mL)          | <ul style="list-style-type: none"> <li>• Predicted: 2.55 ± 0.11 vs 2.14 ± 0.10 (p &lt;0.0001)</li> <li>• Measured: 2.30 ± 0.28 vs 2.37 ± 0.41 (NS)</li> </ul>                                                                    | F: 40.1 ± 12.6<br>M: 36.4 ± 10.0                                                                                                                                                     | --                                                 | NR                                                            |
| Kodaka, et al. <sup>47</sup> (2005)  | P <sub>50</sub> for LOC for propofol (mcg/mL) or sevoflurane (%)          | <ul style="list-style-type: none"> <li>• Sevoflurane: 0.92 ± 0.09 vs 0.83 ± 0.13 (NS)</li> <li>• Propofol: 2.7 ± 0.1 vs 2.9 ± 0.2 (p &lt;0.05)</li> </ul>                                                                        | Sevoflurane:<br>31 ± 6<br>29 ± 7<br>Propofol:<br>F: 29 ± 7<br>M: 30 ± 7                                                                                                              | --                                                 | NR                                                            |
| Li, et al. <sup>66</sup> (2021)      | Mean sevoflurane ET % for BIS 40-60                                       | • 1.574 ± 0.232 vs 1.637 ± 0.266 (NS)                                                                                                                                                                                            | Low sevoflurane:<br>51.32 ± 1.1<br>High sevoflurane:<br>49.46 ± 1.11                                                                                                                 | --                                                 | Low sevoflurane: 214.14 ± 9.2<br>High sevoflurane: 2185 ± 9.0 |
| Myles, et al. <sup>34</sup> (2004)   | BIS value during maintenance of anaesthesia                               | • 46.4 ± 6.6 vs 44.6 ± 7.1 (p = 0.005)                                                                                                                                                                                           | F: 46.4 ± 18<br>M: 56.5 ± 16                                                                                                                                                         | Age-adjusted MAC<br>F: 1.26 ± 0.3<br>M: 1.31 ± 0.3 | F: 34.2 ± 7.8<br>M: 34.8 ± 7.8                                |
| Schultz, et al. <sup>63</sup> (2008) | Time to intra-operative EEG suppression (min)                             | • 4.78 ± 1.07 vs 4.72 ± 1.20 (NS)                                                                                                                                                                                                | F: 49.7 ± 17.7<br>M: 42.8 ± 13.5                                                                                                                                                     | NR                                                 | NR                                                            |
| Sun, et al. <sup>42</sup> (2008)     | OAA/S scores associated with midazolam dose (mg/kg)                       | 60-79yr:<br>• 0.02 mg/kg: 4.80 vs 4.30<br>• 0.06 mg/kg: 3.20 vs 2.80<br>40-59yr:<br>• 0.02 mg/kg: 4.76 vs 4.36<br>• 0.06 mg/kg: 3.72 vs 3.36<br>20-39yr<br>• 0.02 mg/kg: 4.76 vs 4.57<br>• 0.06 mg/kg: 4.37 vs 3.43              | Mean NR                                                                                                                                                                              | Midazolam:<br>0.02mg/kg or 0.06 mg/kg              | NR                                                            |
| Wadhwa, et al. <sup>62</sup> (2003)  | ET % for 1 MAC                                                            | • 6.2 ± 0.4 vs 6.0 ± 0.3 (NS)                                                                                                                                                                                                    | F: 33 ± 9<br>M: 27 ± 8                                                                                                                                                               | --                                                 | F: 24 ± 7 <sup>d</sup><br>M: 23 ± 10 <sup>d</sup>             |
| Xiong, et al. <sup>38</sup> (2019)   | Propofol EC <sub>50</sub> for LOC (mcg/mL)                                | <ul style="list-style-type: none"> <li>• Group 1: 2.17 vs 2.43 (p &lt;0.05)</li> <li>• Group 2: 1.82 vs 1.99 (p &lt;0.05)</li> <li>• Group 3: 1.56 vs 1.72 (p &lt;0.05)</li> <li>• Group 4: 1.32 vs 1.50 (p &lt;0.05)</li> </ul> | Group 1:<br>F: 41.8 ± 6.2<br>M: 43.3 ± 6.2<br>Group 2:<br>F: 44.3 ± 4.4<br>M: 41.1 ± 7.8<br>Group 3:<br>F: 43.5 ± 4.6<br>M: 41.7 ± 7.7<br>Group 4:<br>F: 42.5 ± 6.7<br>M: 40.1 ± 7.3 | --                                                 | NR                                                            |
| Yen, et al. <sup>61</sup> (2011)     | Mean midazolam (0.5mg/mL) + alfentanil (0.1mg/mL) for sedation (mL)       | • 4.8 ± 0.8 vs 4.4 ± 0.7 (p <0.05)                                                                                                                                                                                               | F: 46.9 (30-65)<br>M: 49.6 (34-64)                                                                                                                                                   | --                                                 | F: 11.5 ± 3.0<br>M: 11.2 ± 2.2                                |
| Yeo, et al. <sup>60</sup> (2017)     | Depth of sedation (BIS score) for midazolam 0.04mg/kg + ketamine 0.2mg/kg | • Non-significant difference                                                                                                                                                                                                     | 45.5 ± 11.8                                                                                                                                                                          | Midazolam 0.04mg/kg and                            | NR                                                            |

---

ketamine  
0.2mg/kg

---

**Abbreviations:** BIS, Bispectral Index (processed EEG monitor); CI, confidence interval; EC<sub>50</sub>, effect-site concentration for 50% patients; EEG, electroencephalography; ET, end-tidal; ETAG, end-tidal anaesthetic gas concentration; ICU, intensive care unit; IDD-D, propofol 2%; LMA, laryngeal mask airway; IFT, isolated forearm technique; LOC, loss of consciousness; ; LR, likelihood ratio; MAC, minimum alveolar concentration; NR, not reported; NS, non-significant; OAA/S, observer's assessment of alertness and sedation; P50, plasma concentration for 50% of patients; pEEG, processed electroencephalogram; PACU, post-anaesthesia care unit; SP, standard practice; TCI, target controlled infusion.

<sup>a</sup> Reported in mean +/- SD or mean (range) unless otherwise indicated

<sup>b</sup> Data reported in mean ± SEM

<sup>c</sup> D2/E<sub>0</sub>: stage of deep anaesthesia where the raw EEG is characterised by a substantial amount of delta (0.5-3.5Hz) waves

<sup>d</sup> Time from induction to surgical incision/ET % measurement

<sup>e</sup> Study population excludes those admitted to ICU post-operatively mechanically ventilated

<sup>f</sup> Study population excludes those admitted directly to ICU post-operatively

---

**Supplementary table 4.** Summary Table of Different Models for Confirmed AAGA data.

| Statistical Model                                | Effect Size   |                              |             |              | prediction | Heterogeneity |          |
|--------------------------------------------------|---------------|------------------------------|-------------|--------------|------------|---------------|----------|
|                                                  | Odds Estimate | Ratio                        | 95% CI      | 95% interval |            | P-value       | $\tau^2$ |
| <b>Peto</b>                                      | 1.39          |                              | 1.10 - 1.75 | N/A          |            | 0.01          | NA       |
| <b>Mantel-Haenszel</b>                           | 1.40          |                              | 1.10 - 1.78 | N/A          |            | 0.01          | NA       |
| <b>DerSimonian-Laird*</b>                        | 1.35          |                              | 1.13 - 1.60 | 1.13 - 1.60  |            | 0.00          | 0        |
| <b>Paule-Mandel*</b>                             | 1.35          |                              | 1.13 - 1.60 | 1.13 - 1.60  |            | 0.00          | 0        |
| <b>Restricted Likelihood*</b>                    | 1.35          | <b>Maximum</b>               | 1.13 - 1.60 | 1.13 - 1.60  |            | 0.00          | 0        |
| <b>Restricted Likelihood HKSJ</b>                | 1.35          | <b>Maximum with modified</b> | 1.05 - 1.73 | 1.05-1.73    |            | 0.02          | 0        |
| <b>Restricted Likelihood without HKSJ</b>        | 1.35          | <b>Maximum</b>               | 1.06 - 1.71 | 1.06 - 1.71  |            | 0.02          | 0        |
| <b>Generalised Linear Mixed-Effects Model†,‡</b> | 1.39          |                              | 1.09 - 1.76 | 1.09 - 1.76  |            | 0.02          | 0        |
| <b>Arcsine Difference</b>                        |               |                              |             |              |            |               |          |
| <b>Restricted Likelihood HKSJ</b>                | 0.01          | <b>Maximum with modified</b> | 0.00 - 0.02 | 0.00 - 0.02  |            | 0.02          | 0        |

\* Confidence interval calculated using HKSJ adjustment  
† Confidence interval calculated using t-distribution  
‡ Conditional model, approximate likelihood



**Supplementary table 5.** Summary Table of Different Models for Confirmed or Total AAGA data.

| Statistical Model                                | Effect Size      |       |             |              | Heterogeneity |                  |
|--------------------------------------------------|------------------|-------|-------------|--------------|---------------|------------------|
|                                                  | Odds Estimate    | Ratio | 95% CI      | 95% interval | prediction    | P-value $\tau^2$ |
| <b>Peto</b>                                      | 1.38             |       | 1.13 – 1.69 | N/A          |               | 0.00 NA          |
| <b>Mantel-Haenszel</b>                           | 1.40             |       | 1.14 – 1.72 | N/A          |               | 0.00 NA          |
| <b>DerSimonian-Laird*</b>                        | 1.35             |       | 1.14 – 1.59 | 1.14 – 1.59  |               | 0.00 0           |
| <b>Paule-Mandel*</b>                             | 1.35             |       | 1.14 – 1.59 | 1.14 – 1.59  |               | 0.00 0           |
| <b>Restricted Likelihood*</b>                    | Maximum          | 1.35  | 1.14 – 1.59 | 1.14 – 1.59  |               | 0.00 0           |
| <b>Restricted Likelihood with HKSJ</b>           | Maximum modified | 1.35  | 1.09 – 1.67 | 1.09 – 1.67  |               | 0.01 0           |
| <b>Restricted Likelihood without HKSJ</b>        | Maximum          | 1.35  | 1.09 – 1.66 | 1.09 – 1.66  |               | 0.01 0           |
| <b>Generalised Linear Mixed-Effects Model†,‡</b> |                  | 1.38  | 1.13 – 1.70 | 1.13 – 1.70  |               | 0.00 0           |
| <b>Arcsine Difference</b>                        |                  |       |             |              |               |                  |
| <b>Restricted Likelihood*</b>                    | Maximum          | 0.01  | 0.00 – 0.02 | -0.01 – 0.03 |               | 0.01 0           |

\* Confidence interval calculated using HKSJ adjustment  
† Confidence interval calculated using t-distribution  
‡ Conditional model, approximate likelihood

**Supplementary table 6.** Sequential exclusion analysis for confirmed or possible AAGA data.

| Authors, Year                            | Effect Size |         |                 |    | Heterogeneity   |    |             |         |                    |
|------------------------------------------|-------------|---------|-----------------|----|-----------------|----|-------------|---------|--------------------|
|                                          | Odds Ratio  | p-value | 95% Lower bound | CI | 95% Upper bound | CI | Cochran's Q | p-value | I <sup>2</sup> (%) |
| Avidan et al. (a; ETAG), 2008            | 1.39        | 0.01*   | 1.10            |    | 1.76            |    | 23.85       | 0.69    | 0                  |
| Avidan et al. (a; BIS), 2008             | 1.41        | 0.00*   | 1.11            |    | 1.78            |    | 21.44       | 0.81    | 0                  |
| Avidan et al. (b), 2011                  | 1.42        | 0.01*   | 1.11            |    | 1.82            |    | 23.46       | 0.71    | 0                  |
| Ekman et al., 2004                       | 1.39        | 0.01*   | 1.09            |    | 1.75            |    | 23.86       | 0.69    | 0                  |
| Errando et al., 2008                     | 1.31        | 0.03*   | 1.03            |    | 1.68            |    | 21.38       | 0.81    | 0                  |
| Goldman et al., 1987                     | 1.43        | 0.00*   | 1.13            |    | 1.81            |    | 19.95       | 0.87    | 0                  |
| Kerssens et al., 2003                    | 1.38        | 0.01*   | 1.09            |    | 1.75            |    | 23.80       | 0.69    | 0                  |
| Lallemant et al. (0.2mg/kg), 2003        | 1.39        | 0.01*   | 1.10            |    | 1.75            |    | 23.87       | 0.74    | 0                  |
| Lallemant et al. (0.3mg/kg), 2003        | 1.39        | 0.01*   | 1.10            |    | 1.75            |    | 23.87       | 0.74    | 0                  |
| Lallemant et al. (0.4mg/kg), 2003        | 1.39        | 0.01*   | 1.10            |    | 1.75            |    | 23.87       | 0.74    | 0                  |
| Lennertz et al., 2022                    | 1.38        | 0.01*   | 1.09            |    | 1.75            |    | 23.59       | 0.70    | 0                  |
| Liu et al., 1999                         | 1.39        | 0.01*   | 1.10            |    | 1.77            |    | 23.52       | 0.71    | 0                  |
| Messahel et al., 2007                    | 1.39        | 0.01*   | 1.10            |    | 1.75            |    | 23.87       | 0.74    | 0                  |
| Miller et al. (PLAC), 1996               | 1.37        | 0.01*   | 1.09            |    | 1.74            |    | 23.18       | 0.72    | 0                  |
| Miller et al. (M-15), 1996               | 1.38        | 0.01*   | 1.09            |    | 1.75            |    | 23.64       | 0.70    | 0                  |
| Miller et al. (M-30), 1996               | 1.39        | 0.01*   | 1.10            |    | 1.75            |    | 23.87       | 0.74    | 0                  |
| Miller et al. (M-45), 1996               | 1.38        | 0.01*   | 1.09            |    | 1.75            |    | 23.65       | 0.70    | 0                  |
| Myles et al. (BIS), 2004                 | 1.38        | 0.01*   | 1.09            |    | 1.75            |    | 23.86       | 0.69    | 0                  |
| Myles et al. (RC), 2004                  | 1.38        | 0.01*   | 1.09            |    | 1.76            |    | 23.86       | 0.69    | 0                  |
| Nordstrom et al., 1997                   | 1.38        | 0.01*   | 1.09            |    | 1.74            |    | 23.40       | 0.71    | 0                  |
| Sanders et al., 2017                     | 1.39        | 0.01*   | 1.10            |    | 1.75            |    | 23.87       | 0.74    | 0                  |
| Sandin et al., 2000                      | 1.40        | 0.01*   | 1.10            |    | 1.79            |    | 23.69       | 0.70    | 0                  |
| Schneider et al. (Sevo, low remi), 2003  | 1.39        | 0.01*   | 1.10            |    | 1.75            |    | 23.87       | 0.74    | 0                  |
| Schneider et al. (Sevo, high remi), 2003 | 1.39        | 0.01*   | 1.10            |    | 1.75            |    | 23.87       | 0.74    | 0                  |
| Schneider et al. (Prop, low remi), 2003  | 1.39        | 0.01*   | 1.10            |    | 1.75            |    | 23.87       | 0.74    | 0                  |
| Schneider et al. (Prop, high remi), 2003 | 1.39        | 0.01*   | 1.10            |    | 1.75            |    | 23.87       | 0.74    | 0                  |
| Sebel et al., 2014                       | 1.39        | 0.01*   | 1.09            |    | 1.78            |    | 23.86       | 0.69    | 0                  |
| Singla et al., 2017                      | 1.39        | 0.01*   | 1.10            |    | 1.76            |    | 23.78       | 0.69    | 0                  |
| Wang et al., 2011                        | 1.39        | 0.01*   | 1.09            |    | 1.77            |    | 23.87       | 0.69    | 0                  |
| Wennervirta et al., 2002                 | 1.37        | 0.01*   | 1.08            |    | 1.74            |    | 23.18       | 0.72    | 0                  |
| Wilson et al., 1975                      | 1.36        | 0.01*   | 1.08            |    | 1.73            |    | 22.49       | 0.76    | 0                  |
| Xu et al., 2009                          | 1.33        | 0.03*   | 1.03            |    | 1.72            |    | 23.29       | 0.72    | 0                  |
| Yu et al., 2017                          | 1.39        | 0.01*   | 1.09            |    | 1.77            |    | 23.85       | 0.69    | 0                  |
| Zhang et al. (BIS),                      | 1.38        | 0.01*   | 1.09            |    | 1.75            |    | 23.71       | 0.70    | 0                  |

| 2011                    |      |       |      |      |       |      |   |
|-------------------------|------|-------|------|------|-------|------|---|
| Zhang et al. (RC), 2011 | 1.42 | 0.00* | 1.12 | 1.81 | 22.93 | 0.74 | 0 |
| Celebioglu et al., 2022 | 1.37 | 0.01* | 1.08 | 1.73 | 22.96 | 0.73 | 0 |
| Heggy et al., 2020      | 1.40 | 0.01* | 1.10 | 1.77 | 22.72 | 0.75 | 0 |
| Hou et al., 2019        | 1.49 | 0.00* | 1.16 | 1.90 | 20.08 | 0.86 | 0 |
| Li et al., 2021         | 1.39 | 0.01* | 1.10 | 1.75 | 23.87 | 0.74 | 0 |
| Ranta et al., 1998      | 1.39 | 0.01* | 1.10 | 1.77 | 23.83 | 0.69 | 0 |
| Stait et al., 2008      | 1.34 | 0.02* | 1.05 | 1.70 | 20.53 | 0.84 | 0 |

\* p < 0.05

**Abbreviations:** BIS, Bispectral index; CI, confidence interval; ETAG, end-tidal anaesthetic gas; E-0.2, etomidate 0.2 mg/kg; E-0.3, etomidate 0.3 mg/kg; E-0.4, etomidate 0.4 mg/kg; M-15, midazolam 15 mcg/kg; M-30, midazolam 30 mcg/kg; M-45, midazolam 45 mcg/kg; PLAC, placebo; Prop, propofol; remi, remifentanyl; Sevo, sevoflurane; SP, standard practice.

**Supplementary table 7.** Sequential exclusion analysis for confirmed or total AAGA data.

| Authors, Year                                   | Effect Size |         |                 |    | Heterogeneity   |    |             |         |                    |
|-------------------------------------------------|-------------|---------|-----------------|----|-----------------|----|-------------|---------|--------------------|
|                                                 | Odds Ratio  | p-value | 95% Lower bound | CI | 95% Upper bound | CI | Cochran's Q | p-value | I <sup>2</sup> (%) |
| <b>Avidan et al. (a; ETAG), 2008</b>            | 1.38        | 0.00*   | 1.13            |    | 1.68            |    | 27.37       | 0.50    | 0                  |
| <b>Avidan et al. (a; BIS), 2008</b>             | 1.42        | 0.00*   | 1.16            |    | 1.73            |    | 24.00       | 0.68    | 0                  |
| <b>Avidan et al. (b), 2011</b>                  | 1.41        | 0.00*   | 1.14            |    | 1.73            |    | 27.17       | 0.51    | 0                  |
| <b>Ekman et al., 2004</b>                       | 1.38        | 0.00*   | 1.13            |    | 1.69            |    | 27.55       | 0.49    | 0                  |
| <b>Errando et al., 2008</b>                     | 1.33        | 0.01*   | 1.08            |    | 1.64            |    | 25.11       | 0.62    | 0                  |
| <b>Goldman et al., 1987</b>                     | 1.41        | 0.00*   | 1.15            |    | 1.73            |    | 23.67       | 0.70    | 0                  |
| <b>Kerssens et al., 2003</b>                    | 1.38        | 0.00*   | 1.12            |    | 1.69            |    | 27.48       | 0.49    | 0                  |
| <b>Lallemand et al. (0.2mg/kg), 2003</b>        | 1.38        | 0.00*   | 1.13            |    | 1.69            |    | 27.56       | 0.54    | 0                  |
| <b>Lallemand et al. (0.3mg/kg), 2003</b>        | 1.38        | 0.00*   | 1.13            |    | 1.69            |    | 27.56       | 0.54    | 0                  |
| <b>Lallemand et al. (0.4mg/kg), 2003</b>        | 1.38        | 0.00*   | 1.13            |    | 1.69            |    | 27.56       | 0.54    | 0                  |
| <b>Lennertz et al., 2022</b>                    | 1.39        | 0.00*   | 1.14            |    | 1.70            |    | 27.33       | 0.50    | 0                  |
| <b>Liu et al., 1999</b>                         | 1.39        | 0.00*   | 1.14            |    | 1.70            |    | 27.21       | 0.51    | 0                  |
| <b>Messahel et al., 2007</b>                    | 1.38        | 0.00*   | 1.13            |    | 1.69            |    | 27.56       | 0.54    | 0                  |
| <b>Miller et al. (PLAC), 1996</b>               | 1.37        | 0.00*   | 1.12            |    | 1.68            |    | 26.87       | 0.53    | 0                  |
| <b>Miller et al. (M-15), 1996</b>               | 1.38        | 0.00*   | 1.13            |    | 1.69            |    | 27.33       | 0.50    | 0                  |
| <b>Miller et al. (M-30), 1996</b>               | 1.38        | 0.00*   | 1.13            |    | 1.69            |    | 27.56       | 0.54    | 0                  |
| <b>Miller et al. (M-45), 1996</b>               | 1.38        | 0.00*   | 1.13            |    | 1.69            |    | 27.34       | 0.50    | 0                  |
| <b>Myles et al. (BIS), 2004</b>                 | 1.36        | 0.00*   | 1.11            |    | 1.67            |    | 27.18       | 0.51    | 0                  |
| <b>Myles et al. (RC), 2004</b>                  | 1.38        | 0.00*   | 1.12            |    | 1.70            |    | 27.55       | 0.49    | 0                  |
| <b>Nordstrom et al., 1997</b>                   | 1.38        | 0.00*   | 1.13            |    | 1.68            |    | 27.09       | 0.51    | 0                  |
| <b>Sanders et al., 2017</b>                     | 1.38        | 0.00*   | 1.13            |    | 1.69            |    | 27.56       | 0.54    | 0                  |
| <b>Sandin et al., 2000</b>                      | 1.40        | 0.00*   | 1.14            |    | 1.71            |    | 27.39       | 0.50    | 0                  |
| <b>Schneider et al. (Sevo, low remi), 2003</b>  | 1.38        | 0.00*   | 1.13            |    | 1.69            |    | 27.56       | 0.54    | 0                  |
| <b>Schneider et al. (Sevo, high remi), 2003</b> | 1.38        | 0.00*   | 1.13            |    | 1.69            |    | 27.56       | 0.54    | 0                  |
| <b>Schneider et al. (Prop, low remi), 2003</b>  | 1.38        | 0.00*   | 1.13            |    | 1.69            |    | 27.56       | 0.54    | 0                  |
| <b>Schneider et al. (Prop, high remi), 2003</b> | 1.38        | 0.00*   | 1.13            |    | 1.69            |    | 27.56       | 0.54    | 0                  |
| <b>Sebel et al., 2014</b>                       | 1.44        | 0.00*   | 1.15            |    | 1.79            |    | 26.93       | 0.52    | 0                  |
| <b>Singla et al., 2017</b>                      | 1.39        | 0.00*   | 1.13            |    | 1.70            |    | 27.53       | 0.49    | 0                  |
| <b>Wang et al., 2011</b>                        | 1.38        | 0.00*   | 1.13            |    | 1.70            |    | 27.56       | 0.49    | 0                  |
| <b>Wennervirta et al., 2002</b>                 | 1.35        | 0.00*   | 1.11            |    | 1.66            |    | 25.63       | 0.59    | 0                  |
| <b>Wilson et al., 1975</b>                      | 1.37        | 0.00*   | 1.12            |    | 1.67            |    | 26.18       | 0.56    | 0                  |
| <b>Xu et al., 2009</b>                          | 1.34        | 0.01*   | 1.09            |    | 1.67            |    | 27.00       | 0.52    | 0                  |
| <b>Yu et al., 2017</b>                          | 1.39        | 0.00*   | 1.13            |    | 1.70            |    | 27.54       | 0.49    | 0                  |
| <b>Zhang et al. (BIS), 2011</b>                 | 1.38        | 0.00*   | 1.13            |    | 1.68            |    | 27.40       | 0.50    | 0                  |

|                                |      |       |      |      |       |      |   |
|--------------------------------|------|-------|------|------|-------|------|---|
| <b>Zhang et al. (RC), 2011</b> | 1.41 | 0.00* | 1.15 | 1.73 | 26.64 | 0.54 | 0 |
| <b>Celebioglu et al., 2022</b> | 1.37 | 0.00* | 1.12 | 1.67 | 26.65 | 0.54 | 0 |
| <b>Heggy et al., 2020</b>      | 1.39 | 0.00* | 1.14 | 1.70 | 26.42 | 0.55 | 0 |
| <b>Hou et al., 2019</b>        | 1.45 | 0.00* | 1.18 | 1.79 | 23.89 | 0.69 | 0 |
| <b>Li et al., 2021</b>         | 1.38 | 0.00* | 1.13 | 1.69 | 27.56 | 0.54 | 0 |
| <b>Ranta et al., 1998</b>      | 1.36 | 0.00* | 1.11 | 1.67 | 27.01 | 0.52 | 0 |
| <b>Stait et al., 2008</b>      | 1.35 | 0.00* | 1.10 | 1.65 | 24.23 | 0.67 | 0 |

\* p < 0.05

**Abbreviations:** BIS, Bispectral index; CI, confidence interval; ETAG, end-tidal anaesthetic gas; E-0.2, etomidate 0.2 mg/kg; E-0.3, etomidate 0.3 mg/kg; E-0.4, etomidate 0.4 mg/kg; M-15, midazolam 15 mcg/kg; M-30, midazolam 30 mcg/kg; M-45, midazolam 45 mcg/kg; PLAC, placebo; Prop, propofol; remi, remifentanyl; Sevo, sevoflurane; SP, standard practice.

**Supplementary table 8.** Studies reporting data on emergence from anesthesia

| Anesthetic parameter                    | Studies (n) | Population (n) |      |       | Measure        | Outcome <sup>a</sup>              |             |
|-----------------------------------------|-------------|----------------|------|-------|----------------|-----------------------------------|-------------|
|                                         |             | Female         | Male | Total |                |                                   |             |
| Eye opening                             | 10          | 1959           | 2507 | 4466  | Time (minutes) | Range across studies              | 2.9 – 15.5  |
|                                         |             |                |      |       |                | Females                           | 15.5 – 25.3 |
|                                         |             |                |      |       |                | Males                             | 3.9 – 25.3  |
| Response to/obeying verbal command      | 7           | 769            | 696  | 1456  | Time (minutes) | Range across studies              | 5.6 – 12.4  |
|                                         |             |                |      |       |                | Females                           | 8.3 – 19.0  |
|                                         |             |                |      |       |                | Males                             | 8.3 – 19.0  |
| Extubation                              | 5           | 1544           | 1975 | 3519  | Time (minutes) | Range across studies <sup>b</sup> | 3.2 – 10.6  |
|                                         |             |                |      |       |                | Females                           | 3.5 – 12.2  |
|                                         |             |                |      |       |                | Males                             | 3.5 – 12.2  |
| Duration of PACU stay                   | 3           | 1396           | 2030 | 3426  | Time (minutes) | Range across studies              | 38.8 – 67.4 |
|                                         |             |                |      |       |                | Females                           | 33.7 – 64.0 |
|                                         |             |                |      |       |                | Males                             | 33.7 – 64.0 |
| Orientation                             | 4           | 275            | 271  | 546   | Time (minutes) | Range across studies              | 9.1 – 17.5  |
|                                         |             |                |      |       |                | Females                           | 9.3 – 16    |
|                                         |             |                |      |       |                | Males                             | 9.3 – 16    |
| OAA/S score >5                          | 1           | 16             | 16   | 32    | Time (minutes) | Females                           | 9.5 – 14.5  |
|                                         |             |                |      |       |                | Males                             | 9.3 – 9.5   |
| <b>Other</b>                            |             |                |      |       |                |                                   |             |
| % 'awake' by 30 minutes                 | 1           | 46             | 61   | 107   | % patients     | Female                            | 83%         |
|                                         |             |                |      |       |                | Male                              | 57%         |
| Awakening concentration (%) of volatile | 1           | 20             | 19   | 39    | % volatile     | No significant difference         |             |

<sup>a</sup>Further specifications of outcomes for each study are available in supplementary material

<sup>b</sup>Excluding study that reported time to extubation for patients admitted to ICU<sup>34</sup>

**Abbreviations:** OAA/S: observer's assessment of alertness and sedation.

**Supplementary table 9.** Sequential exclusion analysis for time to eye opening emergence data.

| Author, year                       | Effect size                        |                   |                 |                | Heterogeneity |             |         |                  |                    |
|------------------------------------|------------------------------------|-------------------|-----------------|----------------|---------------|-------------|---------|------------------|--------------------|
|                                    | Mean difference (min) <sup>1</sup> | p-value           | 95% lower bound | CI upper bound | 95% CI        | Cochran's Q | p-value | Tau <sup>2</sup> | I <sup>2</sup> (%) |
| Buchanan et al. (b), 2011          | -2.08                              | 0.00 <sup>t</sup> | -3.39           | -0.77          |               | 135.88      | 0       | 3.44             | 90.76              |
| Buchanan et al. (a), 2006          | -1.89                              | 0.01 <sup>t</sup> | -3.12           | -0.66          |               | 158.76      | 0       | 2.81             | 90.58              |
| Gan et al., 2013                   | -1.90                              | 0.00 <sup>t</sup> | -3.10           | -0.69          |               | 165.47      | 0       | 2.80             | 90.67              |
| Kreuer et al. (SP), 2003           | -2.19                              | 0.00 <sup>t</sup> | -3.47           | -0.91          |               | 173.88      | 0       | 3.35             | 91.95              |
| Kreuer et al. (BIS), 2003          | -2.19                              | 0.00 <sup>t</sup> | -3.48           | -0.90          |               | 173.39      | 0       | 3.40             | 91.87              |
| Kreuer et al. (Narcotrend), 2003   | -2.19                              | 0.00 <sup>t</sup> | -3.49           | -0.89          |               | 172.24      | 0       | 3.43             | 91.55              |
| Riaphus et al., 2017               | -2.26                              | 0.00 <sup>t</sup> | -3.39           | -1.14          |               | 119.10      | 0       | 2.22             | 84.78              |
| Tercan et al. (Des), 2005          | -2.27                              | 0.00 <sup>t</sup> | -3.43           | -1.11          |               | 137.91      | 0       | 2.49             | 86.19              |
| Tercan et al. (Sevo), 2005         | -1.91                              | 0.00 <sup>t</sup> | -3.02           | -0.81          |               | 167.33      | 0       | 2.76             | 90.64              |
| Ward et al. (IDD-D Propofol), 2002 | -1.96                              | 0.00 <sup>t</sup> | -3.13           | -0.78          |               | 169.92      | 0       | 2.90             | 91.04              |
| Ward et al. (Diprivan), 2002       | -2.13                              | 0.00 <sup>t</sup> | -3.44           | -0.81          |               | 164.28      | 0       | 3.48             | 91.66              |
| Bajaj et al., 2007                 | -2.10                              | 0.00 <sup>t</sup> | -3.39           | -0.80          |               | 172.24      | 0       | 3.36             | 92.07              |
| Im et al. (18-29y.o), 2011         | -2.11                              | 0.00 <sup>t</sup> | -3.41           | -0.82          |               | 172.71      | 0       | 3.37             | 92.09              |
| Im et al. (30-39 y.o), 2011        | -1.96                              | 0.01 <sup>t</sup> | -3.23           | -0.69          |               | 160.18      | 0       | 3.09             | 91.28              |
| Im et al. (40-45 y.o), 2011        | -1.89                              | 0.00 <sup>t</sup> | -3.06           | -0.72          |               | 166.61      | 0       | 2.73             | 90.49              |
| Myles et al., 2004                 | -2.11                              | 0.00 <sup>t</sup> | -3.41           | -0.80          |               | 168.31      | 0       | 3.44             | 92.00              |
| Myles et al., 2001                 | -2.15                              | <0.05             | -3.35           | -0.94          |               | 179.39      | 0       | 3.20             | 91.23              |

<sup>1</sup>Females - Males

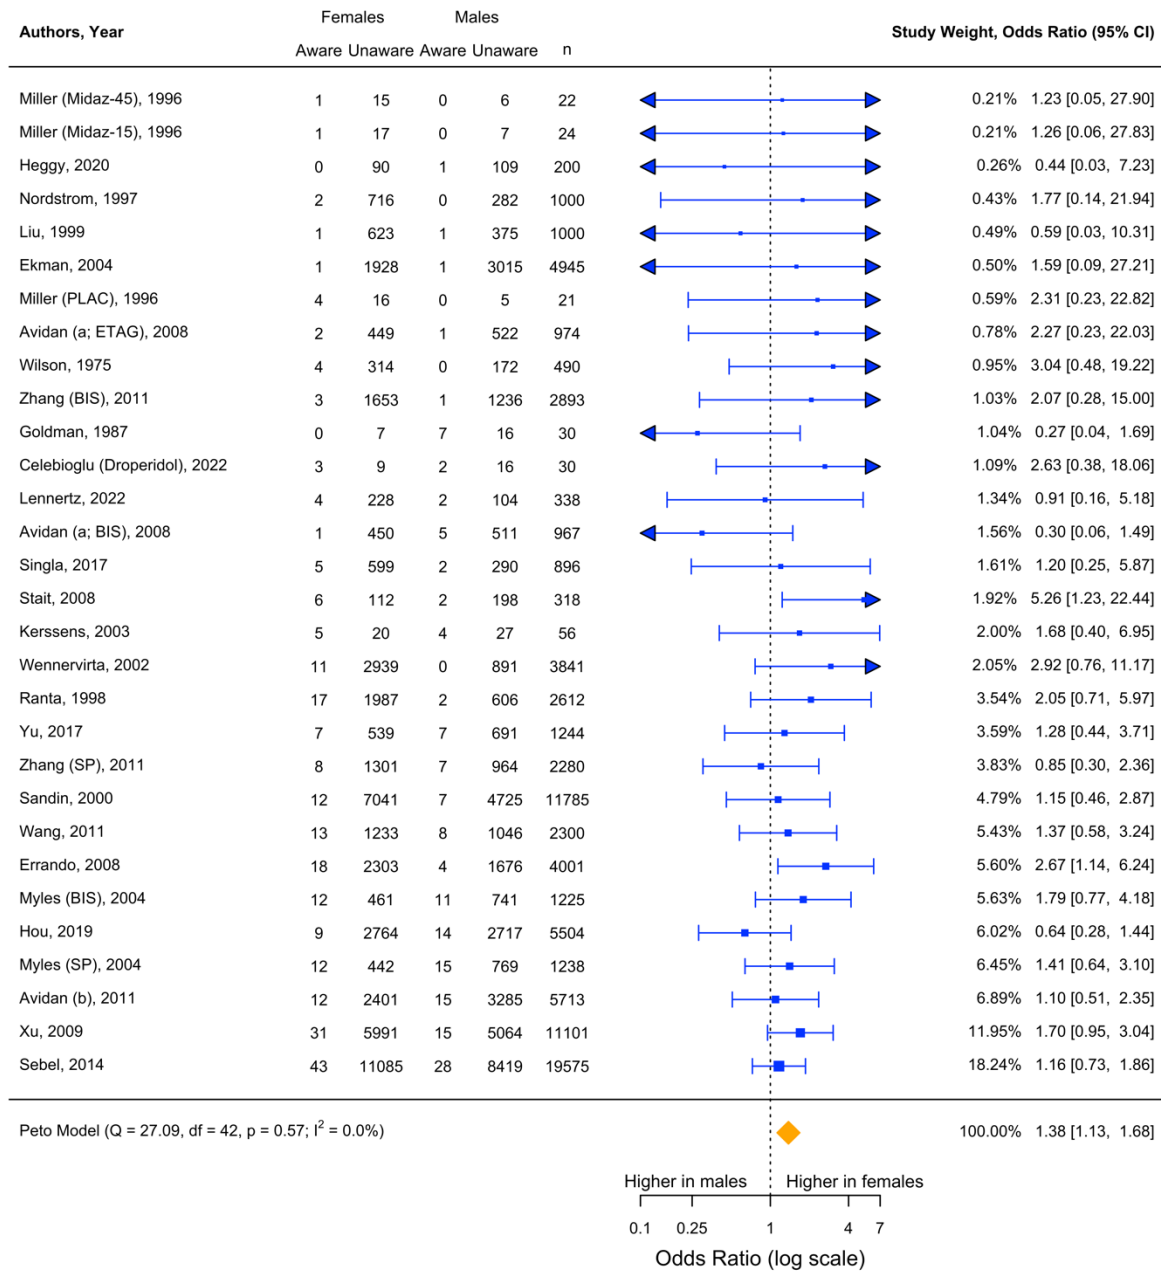

**Supplementary figure 1.** Forest plot of total (possible + confirmed) incidence of awareness with recall. BIS, Bispectral index; ETAG, end-tidal anaesthetic gas; Midaz-15, midazolam 15mcg/kg; Midaz-30, midazolam 30mcg/kg; Midaz-45, midazolam 45 mcg/kg; Prop, propofol; PLAC, placebo; remi, remifentanyl; sevo, sevoflurane; SP, standard practice.



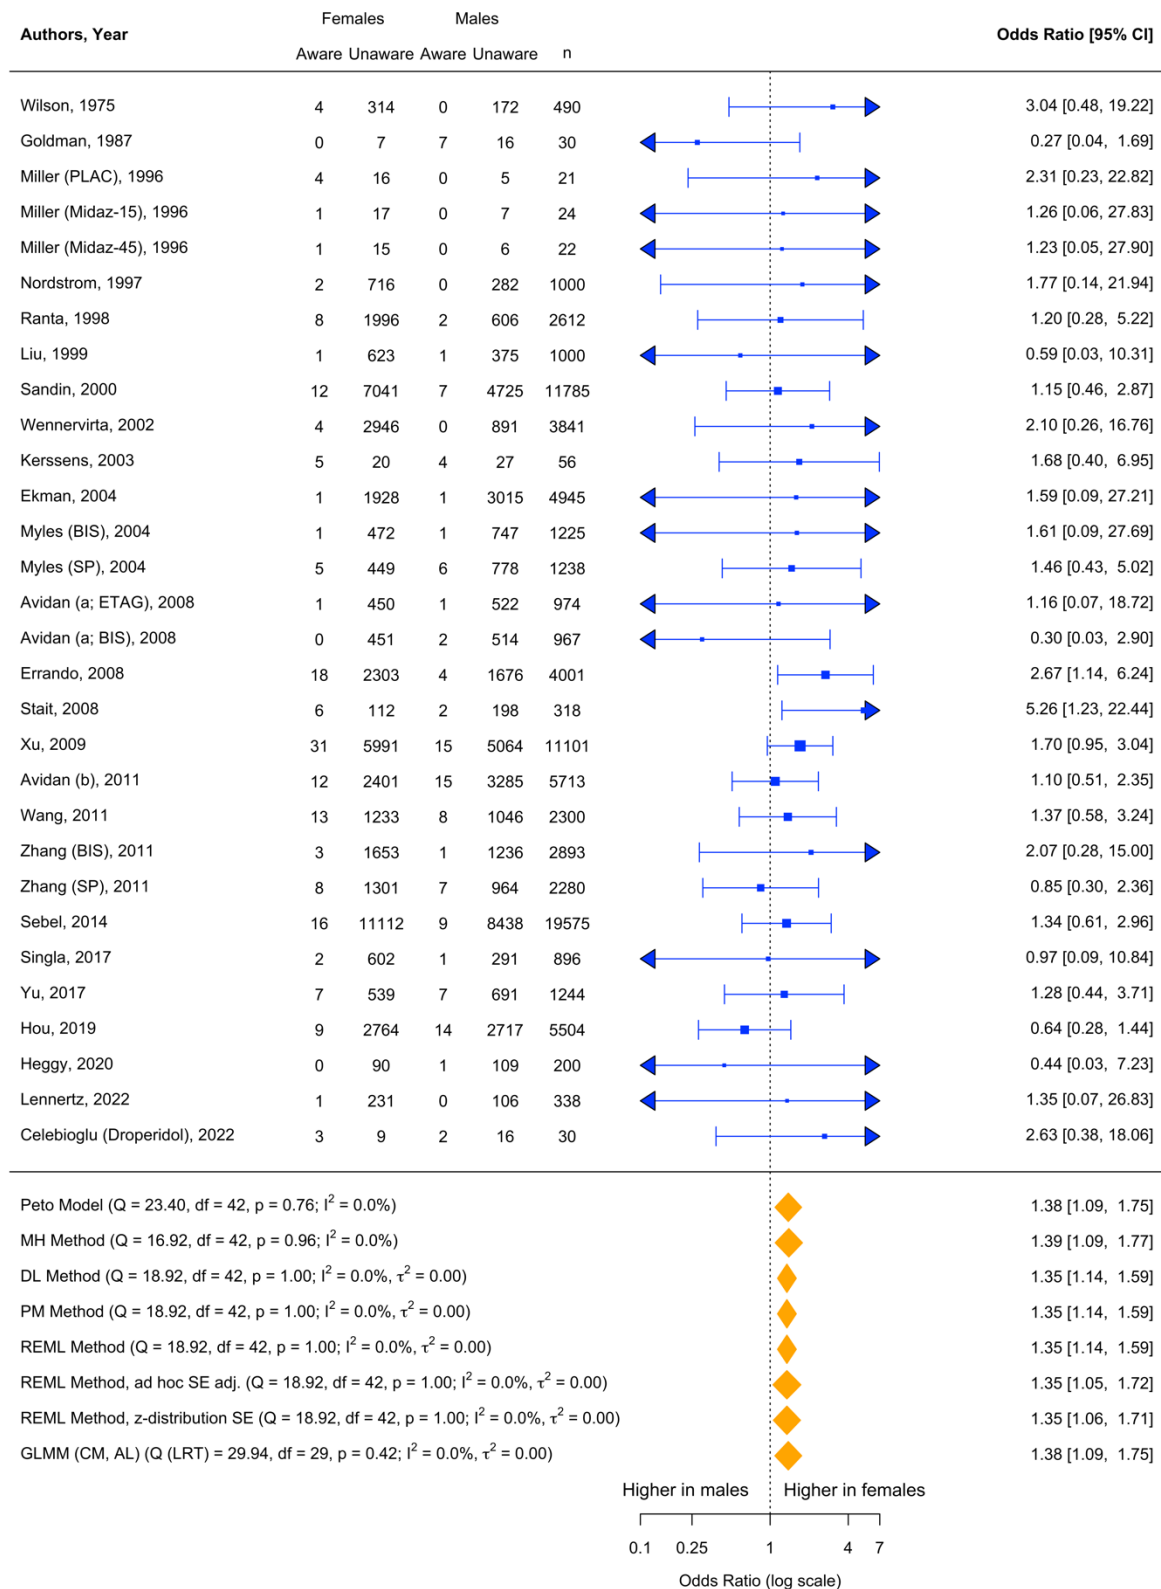

**Supplementary figure 2.** Summary forest plot of confirmed awareness data for differing methods of analysis. BIS, Bispectral index; ETAG, end-tidal anaesthetic gas; Midaz-15, midazolam 15mcg/kg; Midaz-30, midazolam 30mcg/kg; Midaz-45, midazolam 45 mcg/kg; Prop, propofol; PLAC, placebo; remi, remifentanyl; sevo, sevoflurane; SP, standard practice.

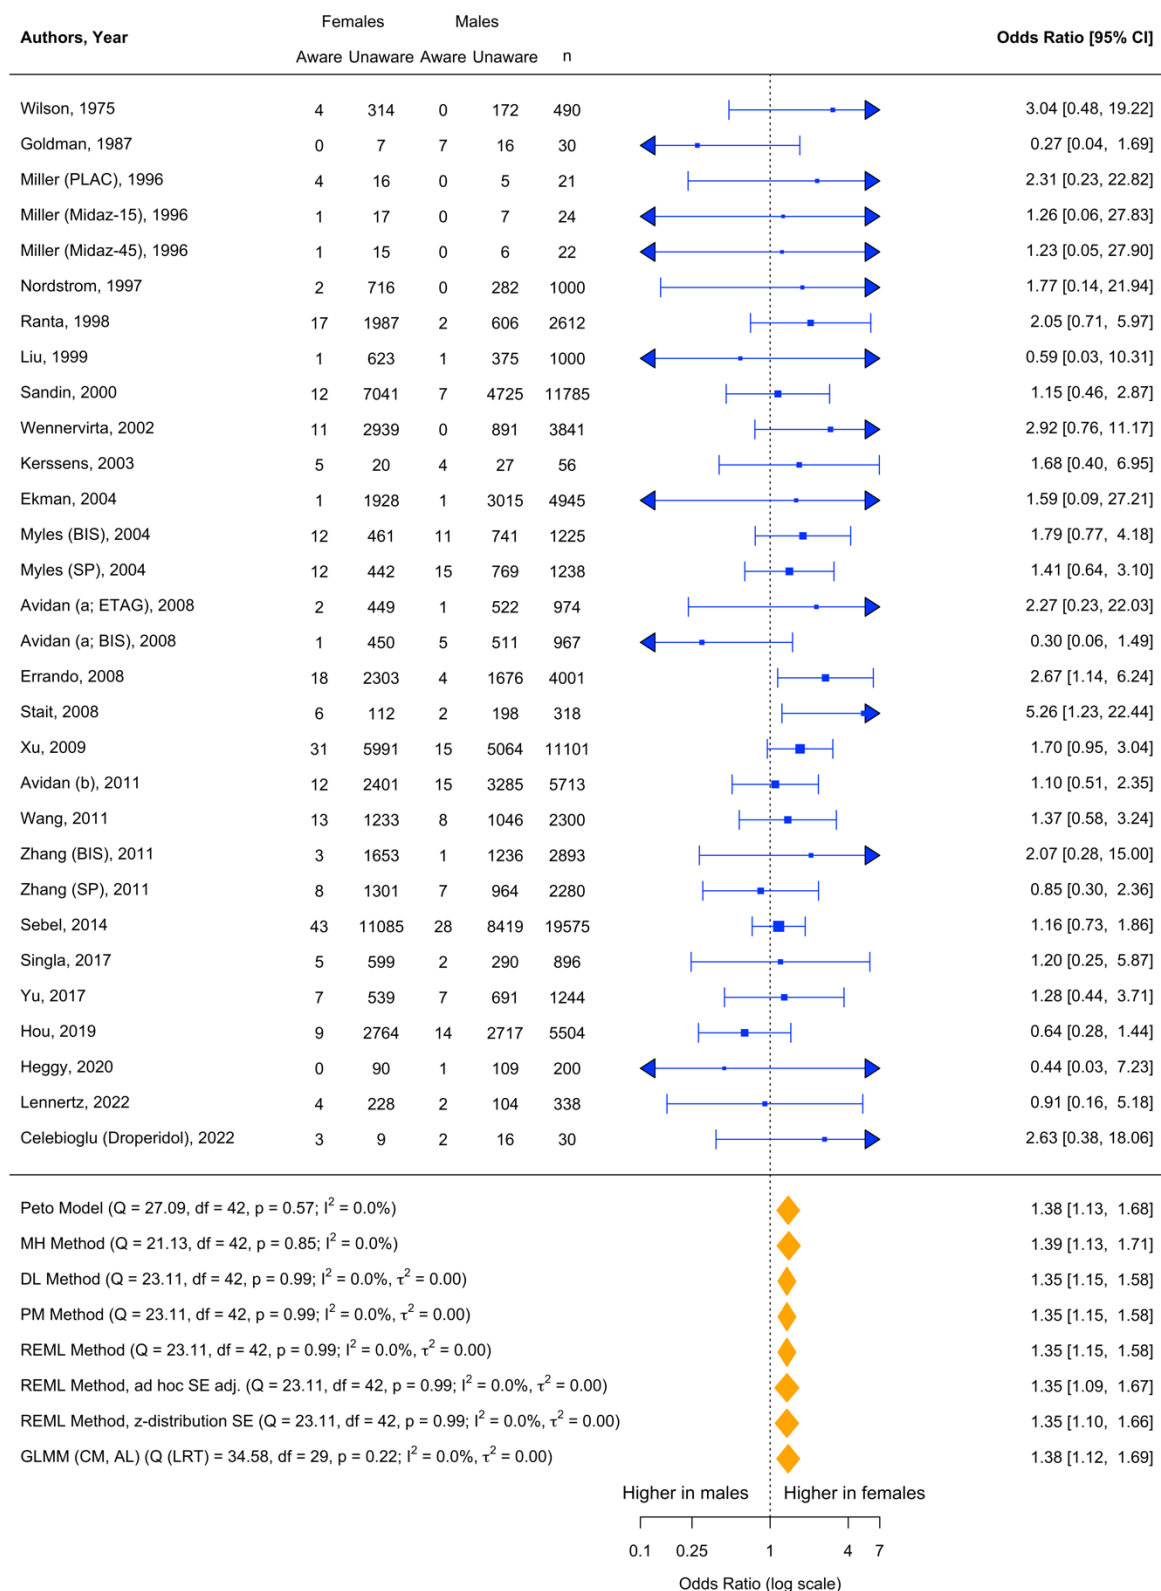

**Supplementary figure 3.** Summary forest plot of total (confirmed and possible) awareness data for differing methods of analysis. BIS, Bispectral index; ETAG, end-tidal anaesthetic gas; 0.2mg/kg, etomidate 0.2mg/kg; 0.3mg/kg, etomidate 0.3mg/kg; 0.4mg/kg, etomidate 0.4mg/kg; M-15, midazolam 15mcg/kg; M-30, midazolam 30mcg/kg; M-45, midazolam 45 mcg/kg; Prop, propofol; PLAC, placebo; RC, routine care; remi, remifentanyl; sevo, sevoflurane.

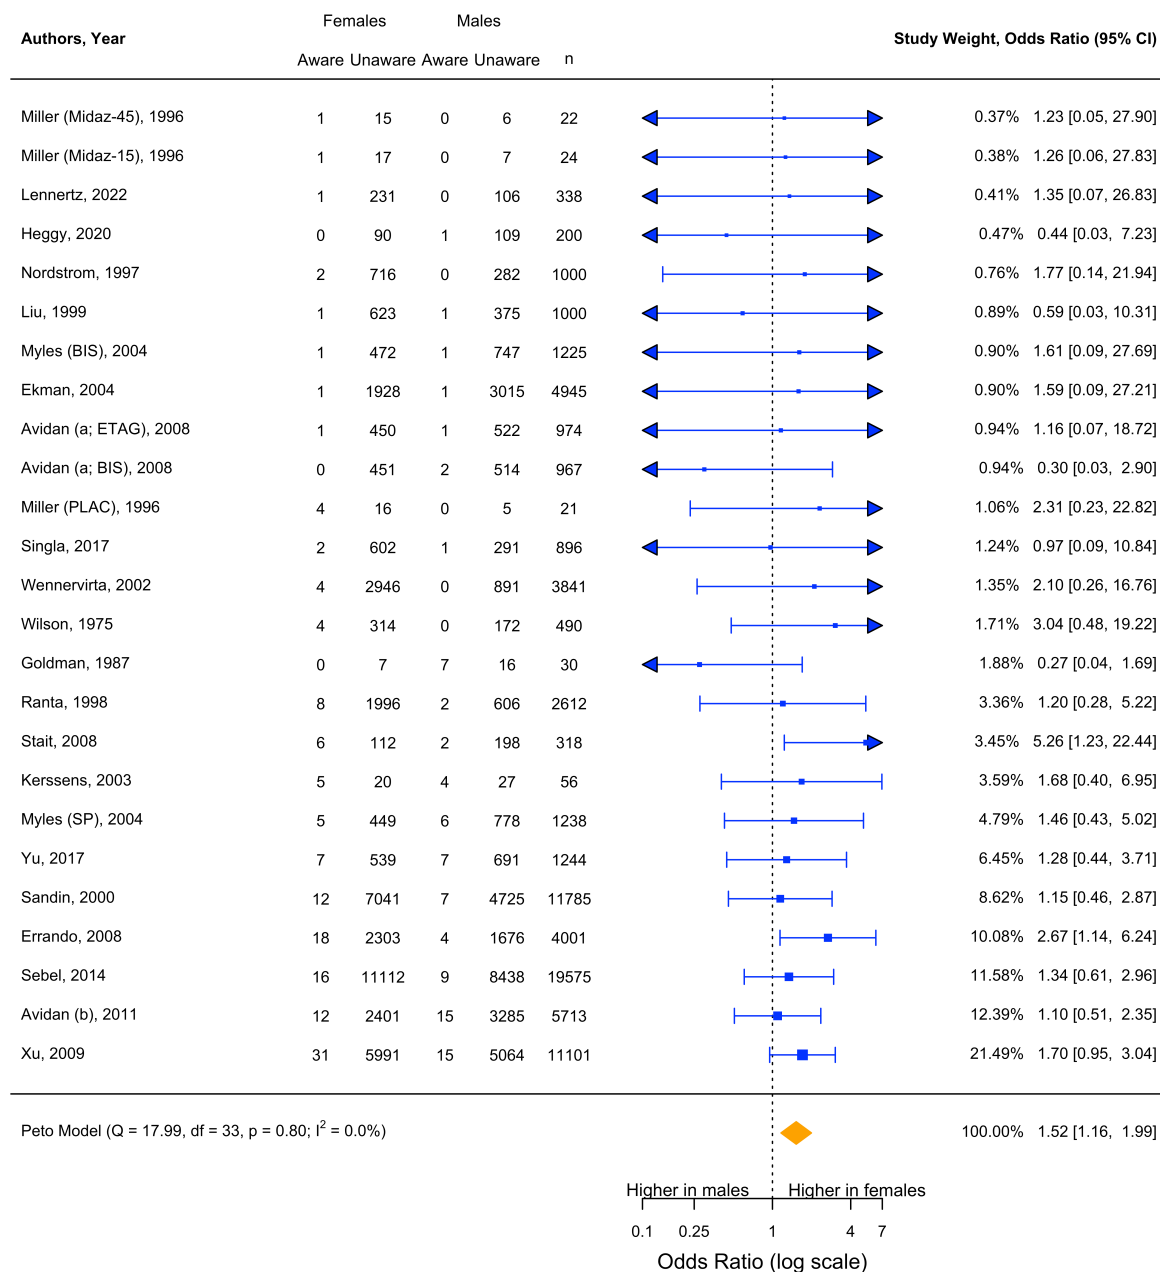

**Supplementary figure 4.** Forest plot of confirmed incidence of awareness with recall with removal of studies of concern from REAPPRAISED assessment. BIS, Bispectral index; ETAG, end-tidal anaesthetic gas; Midaz-15, midazolam 15mcg/kg; Midaz-30, midazolam 30mcg/kg; Midaz-45, midazolam 45 mcg/kg; PLAC, placebo; SP, standard practice.

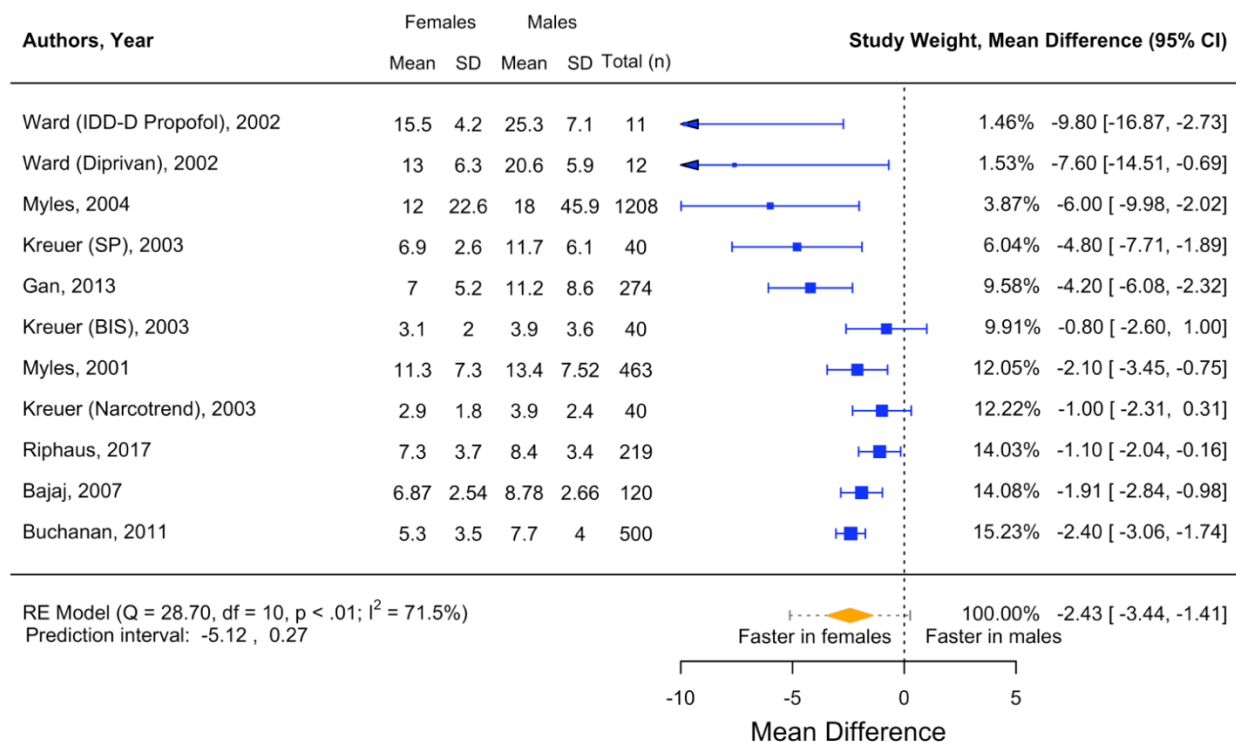

**Supplementary figure 5.** Forest plot of emergence times (time to eye opening) in females versus males with exclusion of studies of concern from REAPPRAISED assessment. BIS, Bispectral Index; SP, standard practice.

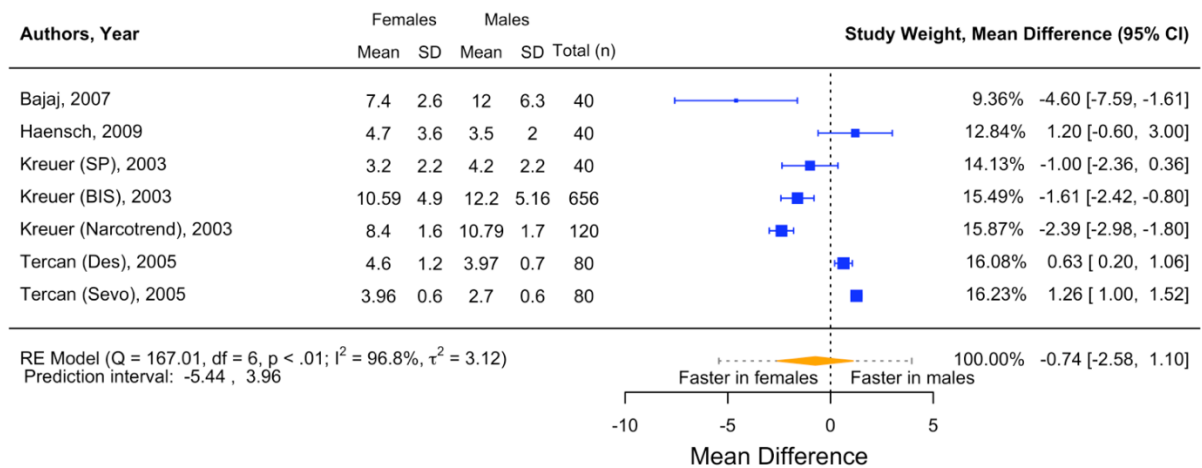

**Supplementary figure 6.** Forest plot of emergence times (time to extubation) in females versus males. BIS, bispectral index; Des, desflurane; Sevo, sevoflurane; SP, standard practice.
